# Supplementary material for: Push–pull tetraene chromophores derived from dialkylaminophenyl, tetrahydroquinolinyl and julolidinyl moieties: optimization of second-order optical nonlinearity by fine-tuning the strength of electron-donating groups
Source: Royal Society of Chemistry journal article supplement (doi:10.1039/c2jm32848h), 2012-01-01
Supplement: c2jm32848h.pdf [file c2jm32848h.pdf]

## Supporting Information for

### **Push-Pull Tetraene Chromophores Derived From Dialkylamino-phenyl, Tetrahydroquinolinyl and Julolidinyl Moieties: Optimization of Second-Order Optical Nonlinearity by Fine-Tuning the Strength of Electron Donating Groups**

Xing-Hua Zhou,<sup>†</sup> Jingdong Luo,<sup>†</sup> Joshua A. Davies,<sup>†</sup> Su Huang<sup>†</sup> and Alex K. Y. Jen<sup>†,‡\*</sup>

<sup>†</sup>Department of Materials Science & Engineering, University of Washington  
Seattle, WA 98195, U. S. A.

<sup>‡</sup>Department of Chemistry, University of Washington, Seattle, WA 98195, U. S. A.

- 1. Quantum mechanical calculations.**
- 2. <sup>1</sup>H and <sup>13</sup>C NMR spectra.**

## 1. Quantum mechanical calculations.

DFT<sup>1,2</sup> calculations were performed using Gaussian 09(A.02)<sup>3</sup> employing the hybrid B3LYP<sup>4,5</sup> exchange-correlation functional with a split valence 6-31G\*<sup>6</sup> basis set. All calculations converged to a RMS error in the density matrix of  $< 10^{-11}$  au. Zero-frequency (static) hyperpolarizabilities [ $\beta(0)$ ] were obtained using analytical derivatives.<sup>7</sup> Chromophores were rotated into frame such that the  $z$  axis was aligned with the dipole axis and  $\beta_{zzz} = \beta_{\mu}$ . Solvent-dependant data was acquired using the default PCM method included in the Gaussian09 program suite. Only a single conformer (all-*E*) was used for each hyperpolarizability calculation.

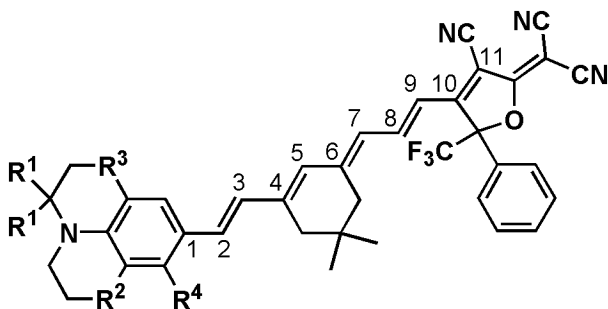

**Fig. S1** Numbering of the carbon atoms in the conjugated bridge for chromophores 1–3.

**Table S1.** Bond Lengths of the conjugated chain of Chromophores 1–3 Obtained by Full Geometry Optimizations using 6-31G\* Basis set as a Function of Solvent (Atom numbering in Fig. S1).

| Compd.   | Solvent                         | C <sub>1</sub> –C <sub>2</sub> | C <sub>2</sub> –C <sub>3</sub> | C <sub>3</sub> –C <sub>4</sub> | C <sub>4</sub> –C <sub>5</sub> | C <sub>5</sub> –C <sub>6</sub> | C <sub>6</sub> –C <sub>7</sub> | C <sub>7</sub> –C <sub>8</sub> | C <sub>8</sub> –C <sub>9</sub> | C <sub>9</sub> –<br>C <sub>10</sub> | C <sub>10</sub> –<br>C <sub>11</sub> |
|----------|---------------------------------|--------------------------------|--------------------------------|--------------------------------|--------------------------------|--------------------------------|--------------------------------|--------------------------------|--------------------------------|-------------------------------------|--------------------------------------|
| <b>1</b> | Vacuum                          | 1.4467                         | 1.3642                         | 1.4368                         | 1.3773                         | 1.4261                         | 1.3849                         | 1.4126                         | 1.3803                         | 1.4114                              | 1.3909                               |
|          | Dioxane                         | 1.4421                         | 1.3680                         | 1.4321                         | 1.3825                         | 1.4199                         | 1.3918                         | 1.4052                         | 1.3875                         | 1.4032                              | 1.3985                               |
|          | CHCl <sub>3</sub>               | 1.4380                         | 1.3714                         | 1.4277                         | 1.3873                         | 1.4143                         | 1.3979                         | 1.3991                         | 1.3938                         | 1.3965                              | 1.4055                               |
|          | CH <sub>2</sub> Cl <sub>2</sub> | 1.4354                         | 1.374                          | 1.4249                         | 1.3905                         | 1.4108                         | 1.4019                         | 1.3954                         | 1.3979                         | 1.3925                              | 1.4101                               |
|          | CH <sub>3</sub> CN              | 1.4323                         | 1.3763                         | 1.4216                         | 1.3941                         | 1.4068                         | 1.4063                         | 1.3914                         | 1.4024                         | 1.3881                              | 1.4152                               |
| <b>2</b> | Vacuum                          | 1.4468                         | 1.3664                         | 1.4356                         | 1.3785                         | 1.4249                         | 1.3858                         | 1.4118                         | 1.3811                         | 1.4106                              | 1.3915                               |
|          | Dioxane                         | 1.4413                         | 1.3709                         | 1.4301                         | 1.3843                         | 1.4180                         | 1.3932                         | 1.4039                         | 1.3888                         | 1.4019                              | 1.3997                               |
|          | CHCl <sub>3</sub>               | 1.4364                         | 1.3749                         | 1.4251                         | 1.3896                         | 1.4119                         | 1.3998                         | 1.3974                         | 1.3957                         | 1.3948                              | 1.4072                               |
|          | CH <sub>2</sub> Cl <sub>2</sub> | 1.4332                         | 1.3775                         | 1.4219                         | 1.3932                         | 1.4080                         | 1.4041                         | 1.3934                         | 1.4001                         | 1.3905                              | 1.4121                               |
|          | CH <sub>3</sub> CN              | 1.4296                         | 1.3806                         | 1.4181                         | 1.3973                         | 1.4038                         | 1.4090                         | 1.3891                         | 1.4050                         | 1.3860                              | 1.4176                               |
| <b>3</b> | Vacuum                          | 1.4504                         | 1.3666                         | 1.4360                         | 1.3785                         | 1.4249                         | 1.3859                         | 1.4117                         | 1.3810                         | 1.4106                              | 1.3917                               |
|          | Dioxane                         | 1.4425                         | 1.3728                         | 1.4286                         | 1.3857                         | 1.4165                         | 1.3944                         | 1.4027                         | 1.3900                         | 1.4008                              | 1.4007                               |
|          | CHCl <sub>3</sub>               | 1.4365                         | 1.3776                         | 1.4229                         | 1.3919                         | 1.4097                         | 1.4018                         | 1.3956                         | 1.3975                         | 1.3932                              | 1.4089                               |
|          | CH <sub>2</sub> Cl <sub>2</sub> | 1.4327                         | 1.3808                         | 1.4190                         | 1.3960                         | 1.4054                         | 1.4066                         | 1.3913                         | 1.4024                         | 1.3885                              | 1.4144                               |
|          | CH <sub>3</sub> CN              | 1.4283                         | 1.3845                         | 1.4147                         | 1.4008                         | 1.4006                         | 1.4120                         | 1.3866                         | 1.4078                         | 1.3837                              | 1.4205                               |

## References

1. P. Hohenberg, W. Kohn, *Phys. Rev.* 1964, **136**, B864.
2. W. Kohn, L. J. Sham, *Phys. Rev.* 1965, **140**, A1133.
3. Gaussian 09, Revision A.02, M. J. Frisch, G. W. Trucks, H. B. Schlegel, G. E. Scuseria, M. A. Robb, J. R. Cheeseman, G. Scalmani, V. Barone, B. Mennucci, G. A. Petersson, H. Nakatsuji, M. Caricato, X. Li, H. P. Hratchian, A. F. Izmaylov, J. Bloino, G. Zheng, J. L. Sonnenberg, M. Hada, M. Ehara, K. Toyota, R. Fukuda, J. Hasegawa, M. Ishida, T. Nakajima, Y. Honda, O. Kitao, H. Nakai, T. Vreven, Jr., J. A. Montgomery, J. E. Peralta, F. Ogliaro, M. Bearpark, J. J. Heyd, E. Brothers, K. N. Kudin, V. N. Staroverov, R. Kobayashi, J. Normand, K. Raghavachari, A. Rendell, J. C. Burant, S. S. Iyengar, J. Tomasi, M. Cossi, N. Rega, N. J. Millam, M. Klene, J. E. Knox, J. B. Cross, V. Bakken, C. Adamo, J. Jaramillo, R. Gomperts, R. E. Stratmann, O. Yazyev, A. J. Austin, R. Cammi, C. Pomelli, J. W. Ochterski, R. L. Martin, K. Morokuma, V. G. Zakrzewski, G. A. Voth, P. Salvador, J. J. Dannenberg, S. Dapprich, A. D. Daniels, Ö. Farkas, J. B. Foresman, J. V. Ortiz, J. Cioslowski, D. J. Fox, Gaussian, Inc., Wallingford CT, 2009.
4. C. Lee, W. Yang, R. G. Parr, *Phys. Rev. B: Condens. Matter* 1988, **37**, 785.
5. A. D. Becke, *J. Chem. Phys.* 1993, **98**, 5648.
6. R. Ditchfield, W. J. Hehre, J. A. Pople, *J. Chem. Phys.* 1971, **54**, 724.

7. (a) J. Gerratt, I. M. Mills, *J. Chem. Phys* 1968, **49**, 1719. (b) C. E. Dykstra, P. G. Jasien, *Chem. Phys. Lett.* 1984, **109**, 388. (c) J. E. Rice, N. C. Handy, *J. Chem. Phys.* 1991, **94**, 4959.

## 2. <sup>1</sup>H and <sup>13</sup>C NMR spectra

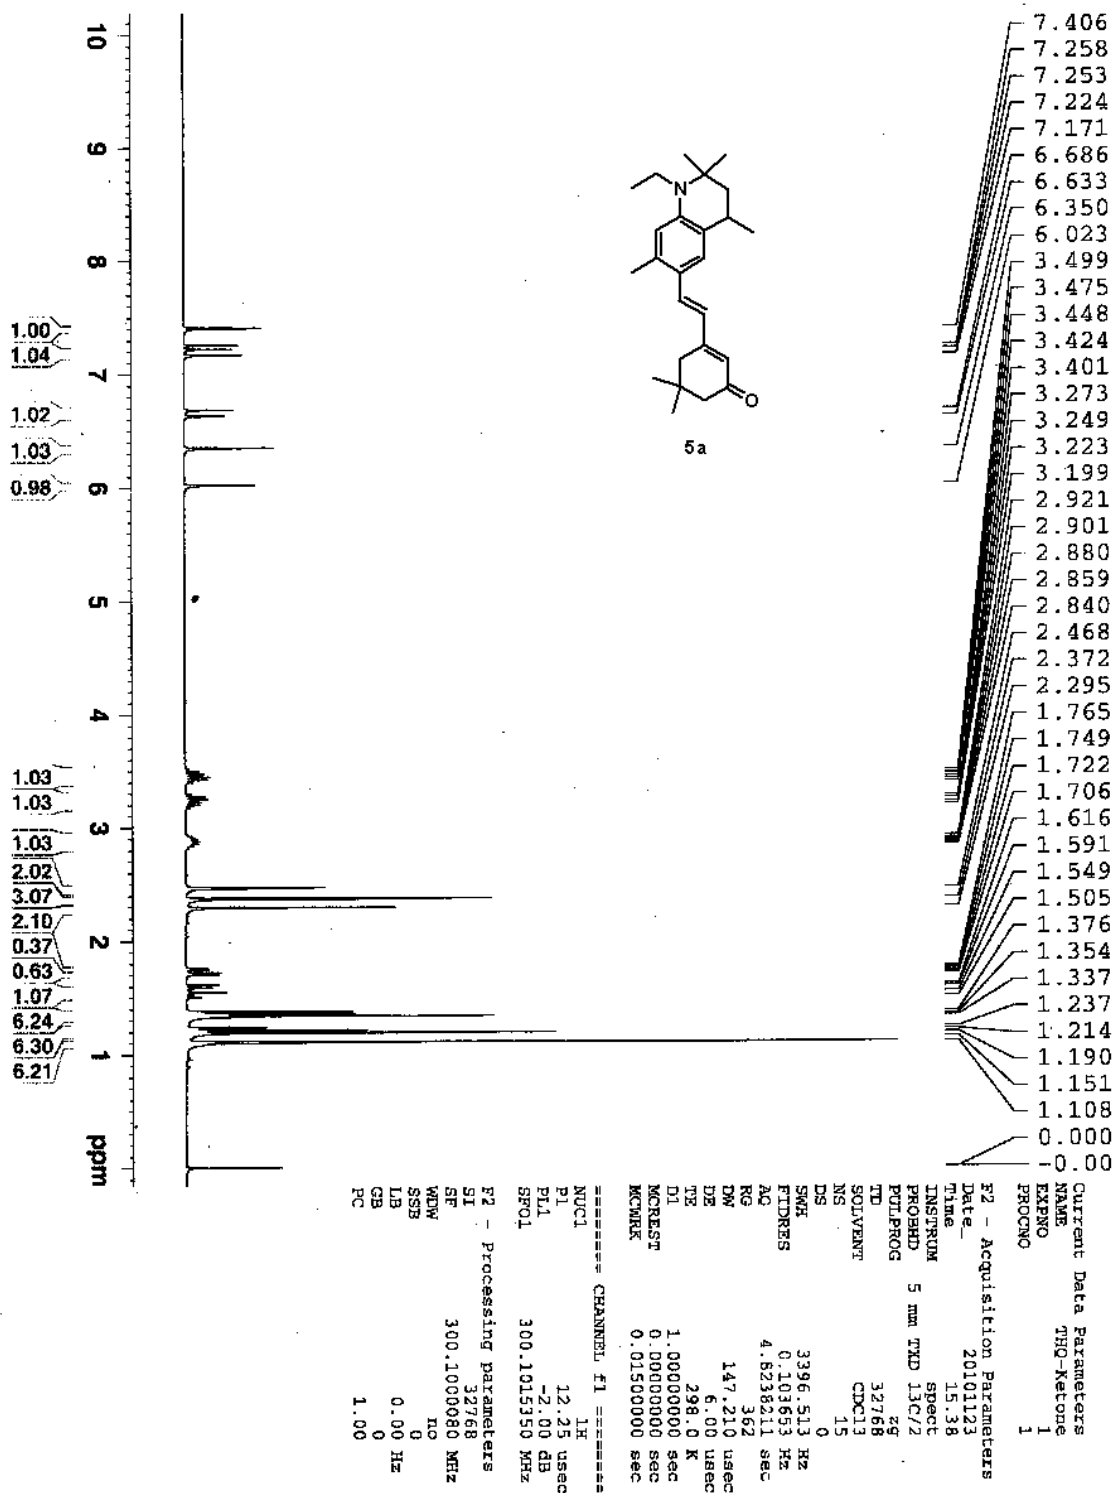

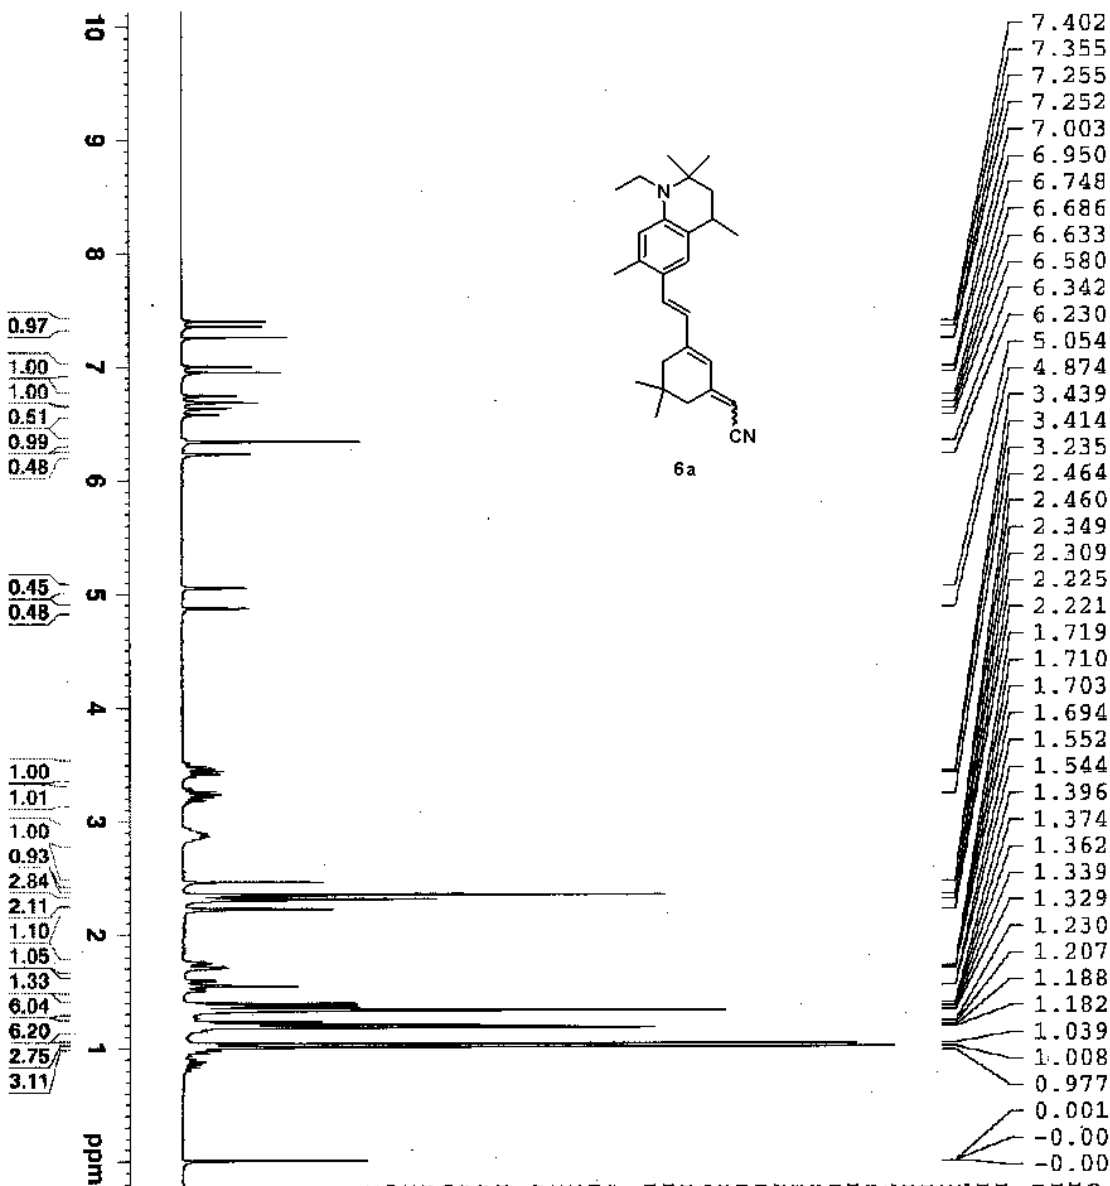

Current Data Parameters

|        |        |
|--------|--------|
| NAME   | THQ-CN |
| EXPNO  | 1      |
| PROCNO | 1      |

F2 - Acquisition Parameters

|         |                |
|---------|----------------|
| Date_   | 20101123       |
| Time    | 15.58          |
| INSTRUM | spect          |
| PROBHD  | 5 mm TPD 13C/2 |
| PULPROG | zgpg30         |
| TD      | 32768          |
| SOLVENT | CDCl3          |
| NS      | 64             |
| DS      | 0              |
| SWE     | 3396.513 Hz    |
| FIDRES  | 0.103653 Hz    |
| AQ      | 4.8238211 sec  |
| RG      | 512            |
| DW      | 147.210 usec   |
| DE      | 6.00 usec      |
| TE      | 298.0 K        |
| D1      | 1.00000000 sec |
| MCRESST | 0.00000000 sec |
| MCRMK   | 0.01500000 sec |

==== CHANNEL f1 =====

|      |                 |
|------|-----------------|
| NUC1 | 1H              |
| P1   | 12.25 usec      |
| PL1  | -2.00 dB        |
| SFO1 | 300.1015350 MHz |

F2 - Processing parameters

|     |                 |
|-----|-----------------|
| SI  | 32768           |
| SF  | 300.1000687 MHz |
| MDW | nc              |
| SSB | 0               |
| LB  | 0.00 Hz         |
| GB  | 0               |
| PC  | 1.00            |

- 7.402
- 7.355
- 7.255
- 7.252
- 7.003
- 6.950
- 6.748
- 6.686
- 6.633
- 6.580
- 6.342
- 6.230
- 5.054
- 4.874
- 3.439
- 3.414
- 3.235
- 2.464
- 2.460
- 2.349
- 2.309
- 2.225
- 2.221
- 1.719
- 1.710
- 1.703
- 1.694
- 1.552
- 1.544
- 1.396
- 1.374
- 1.362
- 1.339
- 1.329
- 1.230
- 1.207
- 1.188
- 1.182
- 1.039
- 1.008
- 0.977
- 0.001
- 0.00
- 0.00

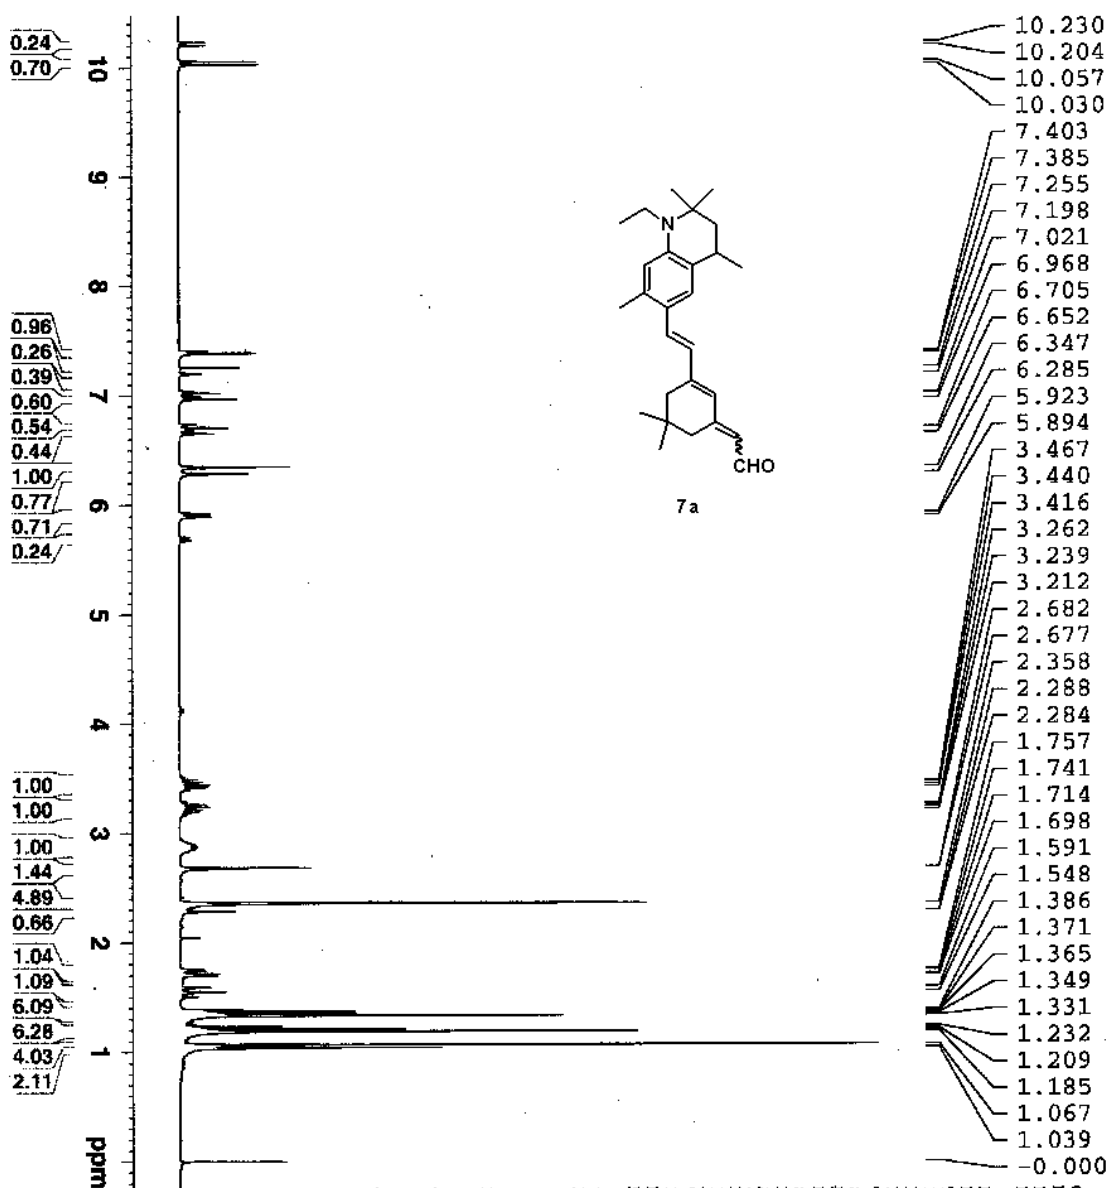

Current Data Parameters  
 NAME THQ-CHO  
 EXPNO 1  
 PROCNO 1

F2 - Acquisition Parameters  
 Date\_ 20101129  
 Time 14.42  
 INSTRUM spect  
 PROHD 5 mm TXD 13C/2  
 PULPROG zg  
 TD 32768  
 SOLVENT CDCl3  
 NS 13  
 DS 0  
 SWH 3396.513 Hz  
 FIDRES 0.103653 Hz  
 AQ 4.8238211 sec  
 RG 181  
 DW 147.210 usec  
 DE 6.00 usec  
 TE 298.0 K  
 D1 1.00000000 sec  
 MCREST 0.00000000 sec  
 MCWRRK 0.01500000 sec

==== CHANNEL F1 =====  
 NUC1 1H  
 P1 12.25 usec  
 PL -2.00 dB  
 SFO1 300.1015350 MHz

F2 - Processing parameters  
 SI 32768  
 SF 300.1000089 MHz  
 WDW DO  
 SSB 0  
 LB 0.00 Hz  
 GB 0  
 PC 1.00

Integration values (from left to right):  
 0.24, 0.70, 0.96, 0.26, 0.39, 0.60, 0.54, 0.44, 1.00, 0.77, 0.71, 0.24, 1.00, 1.00, 1.00, 1.44, 4.89, 0.66, 1.04, 1.09, 6.09, 6.28, 4.03, 2.11

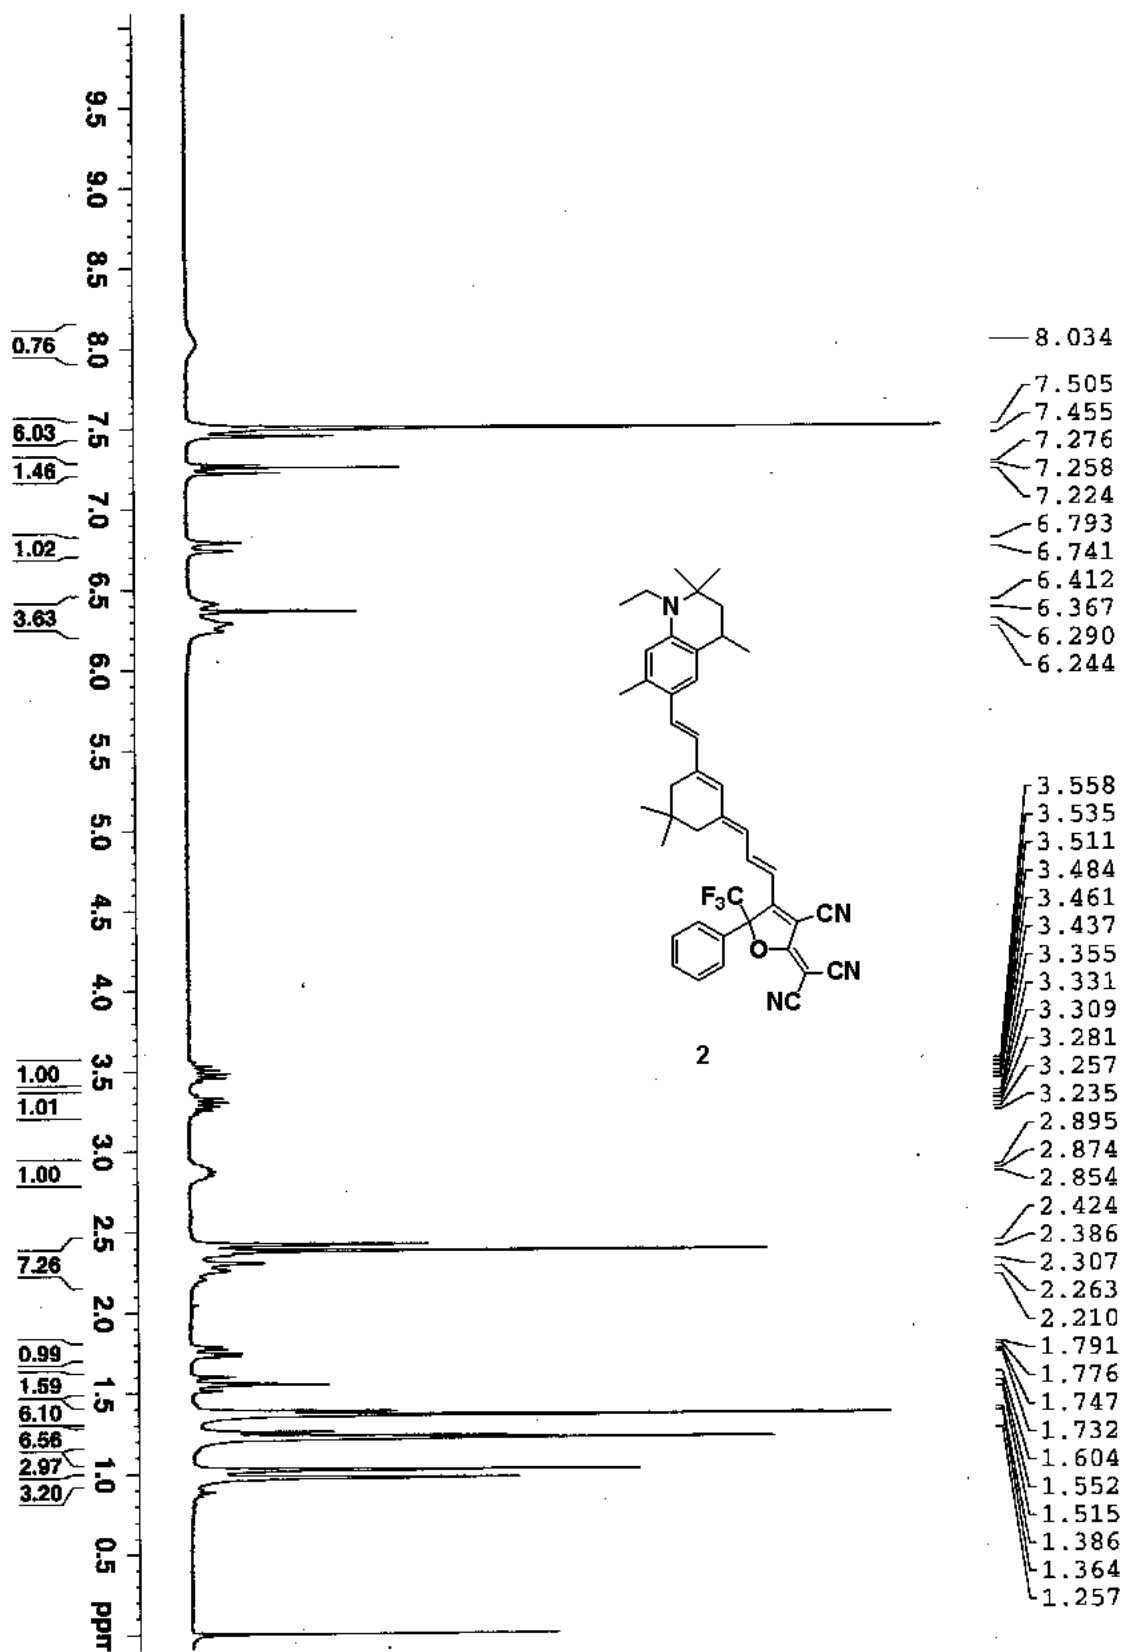



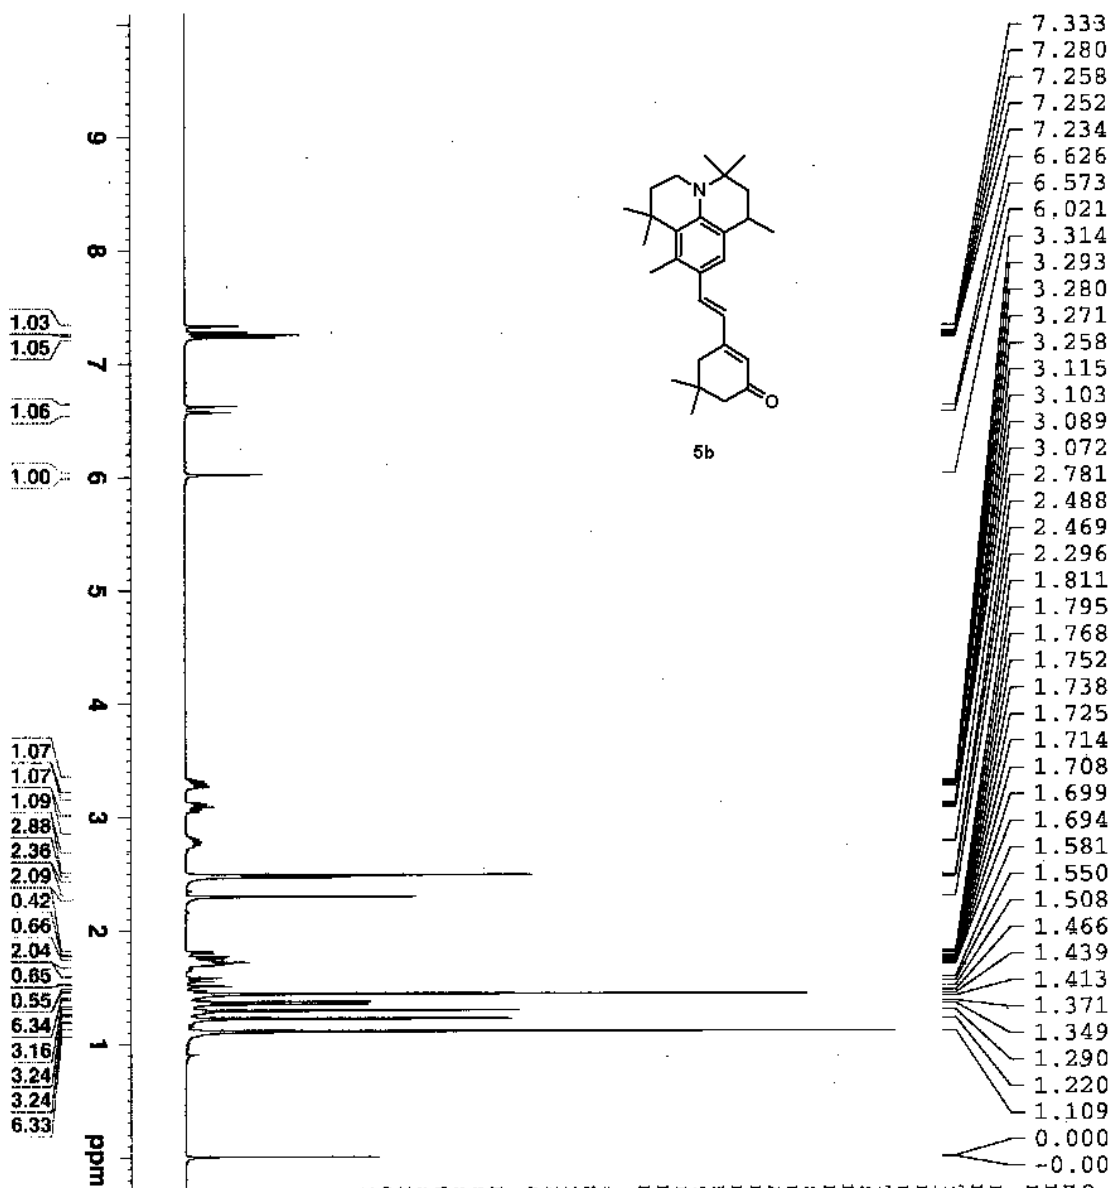

| Chemical Shift (ppm) |
|----------------------|
| 7.333                |
| 7.280                |
| 7.258                |
| 7.252                |
| 7.234                |
| 6.626                |
| 6.573                |
| 6.021                |
| 3.314                |
| 3.293                |
| 3.280                |
| 3.271                |
| 3.258                |
| 3.115                |
| 3.103                |
| 3.089                |
| 3.072                |
| 2.781                |
| 2.488                |
| 2.469                |
| 2.296                |
| 1.811                |
| 1.795                |
| 1.768                |
| 1.752                |
| 1.738                |
| 1.725                |
| 1.714                |
| 1.708                |
| 1.699                |
| 1.694                |
| 1.581                |
| 1.550                |
| 1.508                |
| 1.466                |
| 1.439                |
| 1.413                |
| 1.371                |
| 1.349                |
| 1.290                |
| 1.220                |
| 1.109                |
| 0.000                |

```

Current Data Parameters
NAME JLD-Ketone
EXPNO 1
PROCNO 1

F2 - Acquisition Parameters
Date_ 20101123
Time 15.48
INSTRUM spect
PROBHD 5 mm TGD 13C/2
PULPROG zg
TD 32768
SOLVENT CDCl3
NS 64
DS 0
SWH 3396.513 Hz
FIDRES 0.103653 Hz
AQ 4.8238211 sec
RG 512
LW 147.210 usec
DE 6.00 usec
TE 298.0 K
DI 1.00000000 sec
MCREST 0.00000000 sec
MCWRRK 0.01500000 sec

===== CHANNEL f1 =====
NUC1 1H
P1 12.25 usec
PL1 -2.00 dB
SFO1 300.1015350 MHz

F2 - Processing parameters
SI 32768
SF 300.1000079 MHz
WDW ho
SSB 0
LB 0.00 Hz
GB 0
PC 1.00
    
```

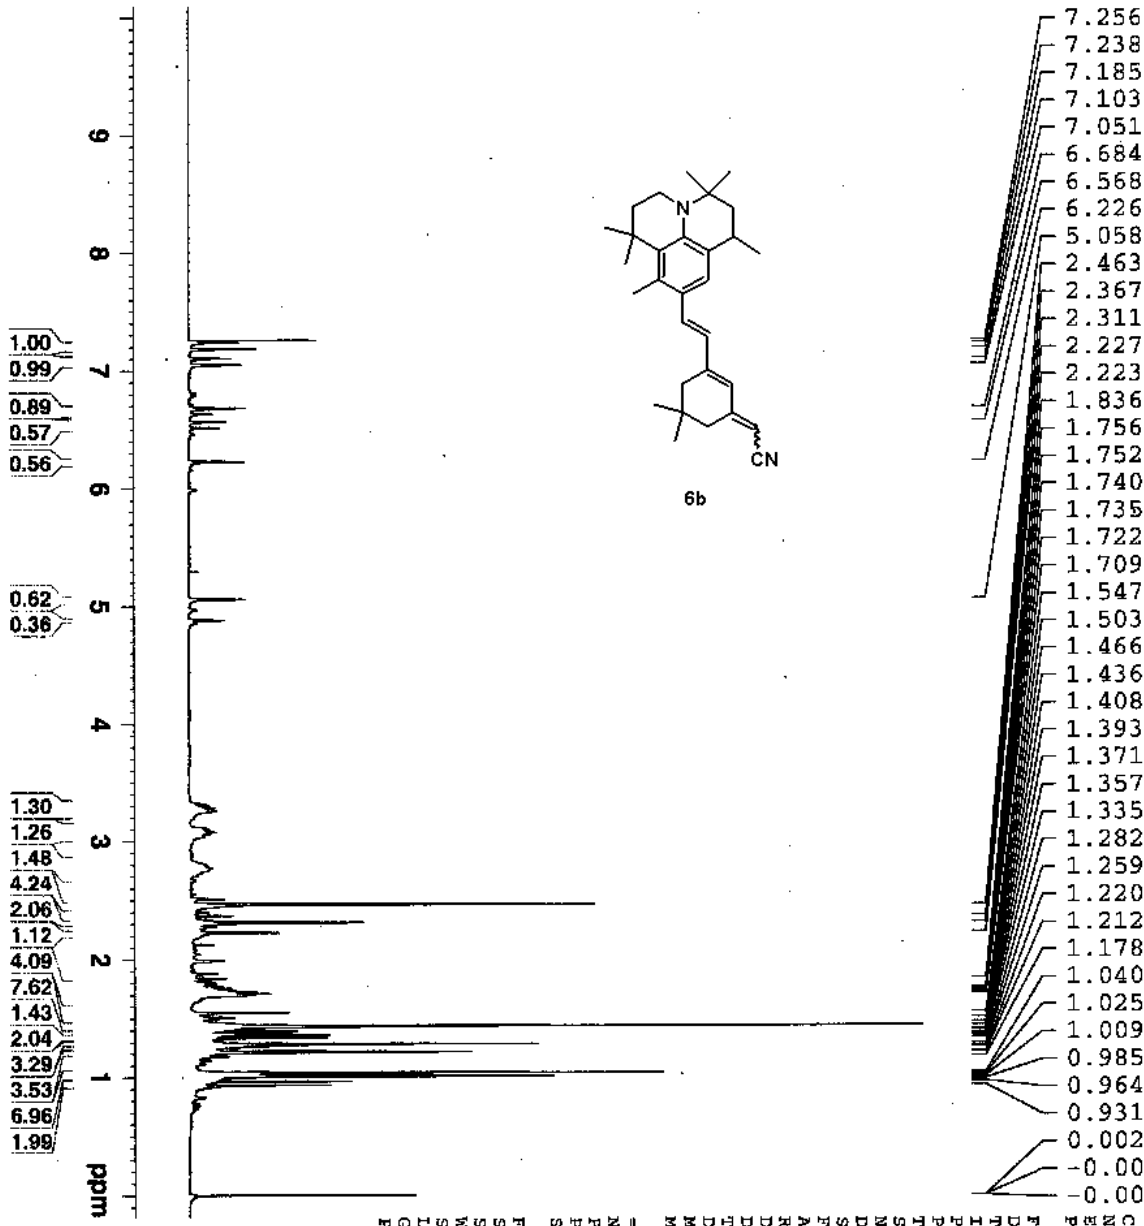

Current Data Parameters

|        |        |
|--------|--------|
| NAME   | JTD-CN |
| EXPNO  | 1      |
| PROCNO | 1      |

F2 - Acquisition Parameters

|         |                |
|---------|----------------|
| Date_   | 20101129       |
| Time    | 12.07          |
| INSTRUM | INSTRUM        |
| PROBHD  | 5 mm TXD 13C/2 |
| PULPROG | zgpg30         |
| TD      | 32768          |
| SOLVENT | CDCl3          |
| DS      | 2              |
| SWH     | 3396.513 Hz    |
| FIDRES  | 0.103653 Hz    |
| AQ      | 4.8238211 sec  |
| RG      | 406.4          |
| AW      | 147.210 usec   |
| DE      | 6.00 usec      |
| TE      | 298.0 K        |
| D1      | 1.00000000 sec |
| MCREST  | 0.00000000 sec |
| MCWPRK  | 0.01500000 sec |

CHANNEL f1 =====

|      |                 |
|------|-----------------|
| MUCL | 1H              |
| PL   | 12.25 usec      |
| PL1  | -2.00 dB        |
| SFO1 | 300.1015350 MHz |

F2 - Processing parameters

|     |                 |
|-----|-----------------|
| SI  | 32768           |
| SF  | 300.1000084 MHz |
| WDW | hc              |
| SSB | 0               |
| IB  | 0.00 Hz         |
| GB  | 0               |
| PC  | 1.00            |

- 1.00
- 0.99
- 0.89
- 0.57
- 0.56
- 0.62
- 0.36
- 1.30
- 1.26
- 1.48
- 4.24
- 2.06
- 1.12
- 4.09
- 7.62
- 1.43
- 2.04
- 3.29
- 3.53
- 6.96
- 1.98

- 7.256
- 7.238
- 7.185
- 7.103
- 7.051
- 6.684
- 6.568
- 6.226
- 5.058
- 2.463
- 2.367
- 2.311
- 2.227
- 2.223
- 1.836
- 1.756
- 1.752
- 1.740
- 1.735
- 1.722
- 1.709
- 1.547
- 1.503
- 1.466
- 1.436
- 1.408
- 1.393
- 1.371
- 1.357
- 1.335
- 1.282
- 1.259
- 1.220
- 1.212
- 1.178
- 1.040
- 1.025
- 1.009
- 0.985
- 0.964
- 0.931
- 0.002
- 0.00
- 0.00

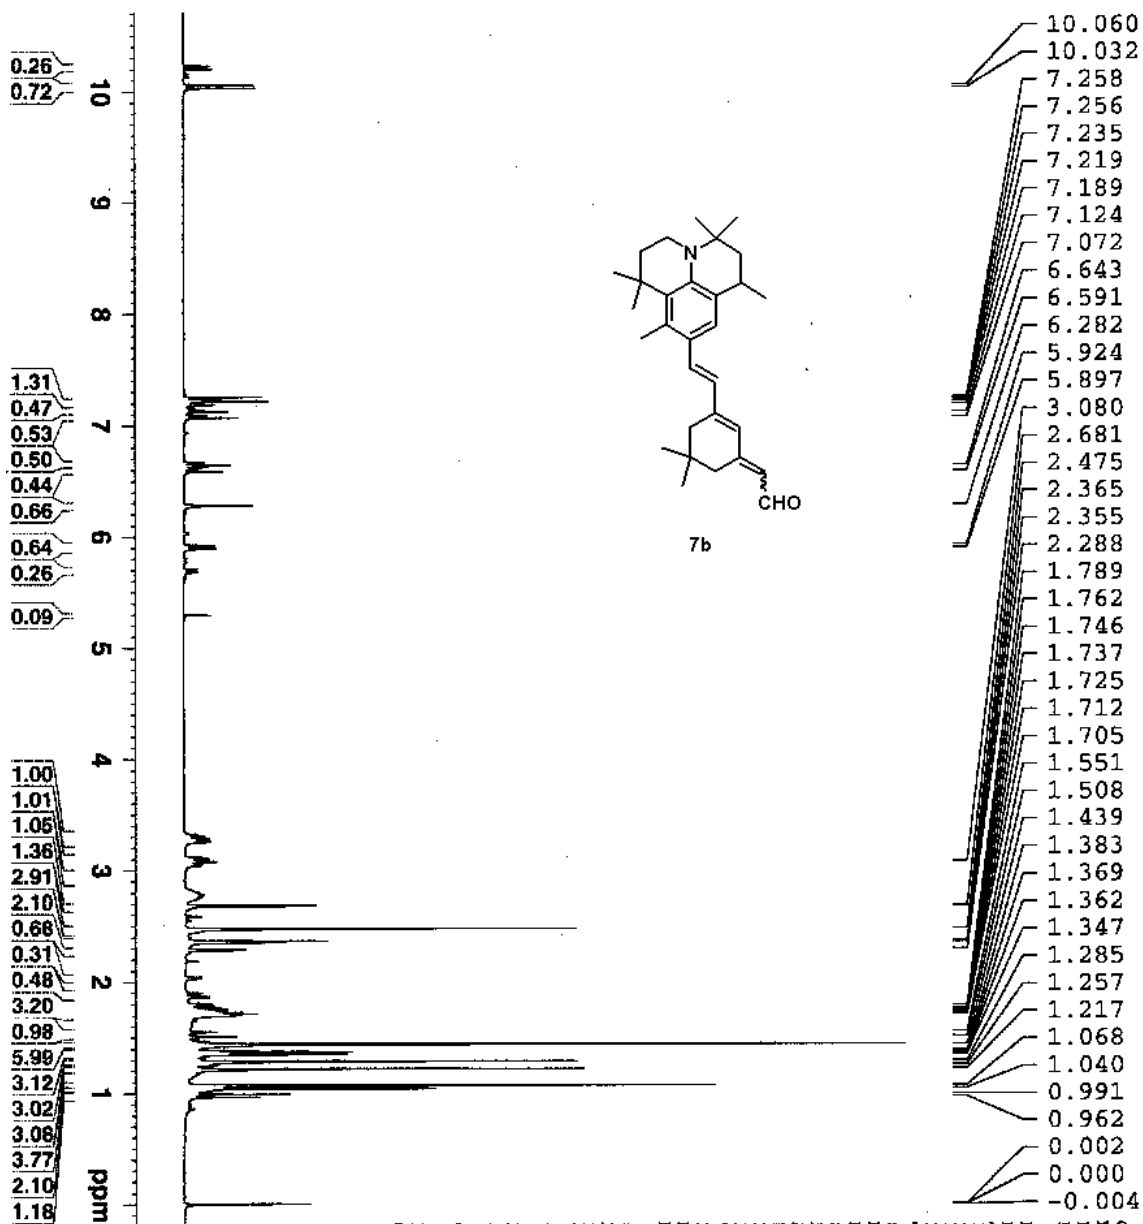

Current Data Parameters  
 NAME JLD-CHO  
 EXPNO 1  
 PROCNO 1

F2 - Acquisition Parameters  
 Date\_ 20101129  
 Time 14.52  
 INSTRUM spect  
 PROBD 5 mm TXD 13C/2  
 PULPROG zgpg30  
 TD 29  
 SOLVENT CDCl3  
 NS 64  
 DS 0  
 SWH 3396.513 Hz  
 FIDRES 0.103653 Hz  
 AQ 4.8218211 sec  
 RG 287.4  
 DW 147.210 usec  
 DE 6.00 usec  
 TE 298.0 K  
 D1 1.00000000 sec  
 MCRESTP 0.00000000 sec  
 MCMTXK 0.01500000 sec

==== CHANNEL f1 =====  
 NUC1 1H  
 P1 12.25 usec  
 PL -2.00 dB  
 SFO1 300.1015350 MHz

F2 - Processing parameters  
 SI 32768  
 SF 300.1000084 MHz  
 MDW hc  
 SSB 0  
 LB 0.00 Hz  
 GB 0  
 PC 1.00

- 10.060
- 10.032
- 7.258
- 7.256
- 7.235
- 7.219
- 7.189
- 7.124
- 7.072
- 6.643
- 6.591
- 6.282
- 5.924
- 5.897
- 3.080
- 2.681
- 2.475
- 2.365
- 2.355
- 2.288
- 1.789
- 1.762
- 1.746
- 1.737
- 1.725
- 1.712
- 1.705
- 1.551
- 1.508
- 1.439
- 1.383
- 1.369
- 1.362
- 1.347
- 1.285
- 1.257
- 1.217
- 1.068
- 1.040
- 0.991
- 0.962
- 0.002
- 0.000
- 0.004

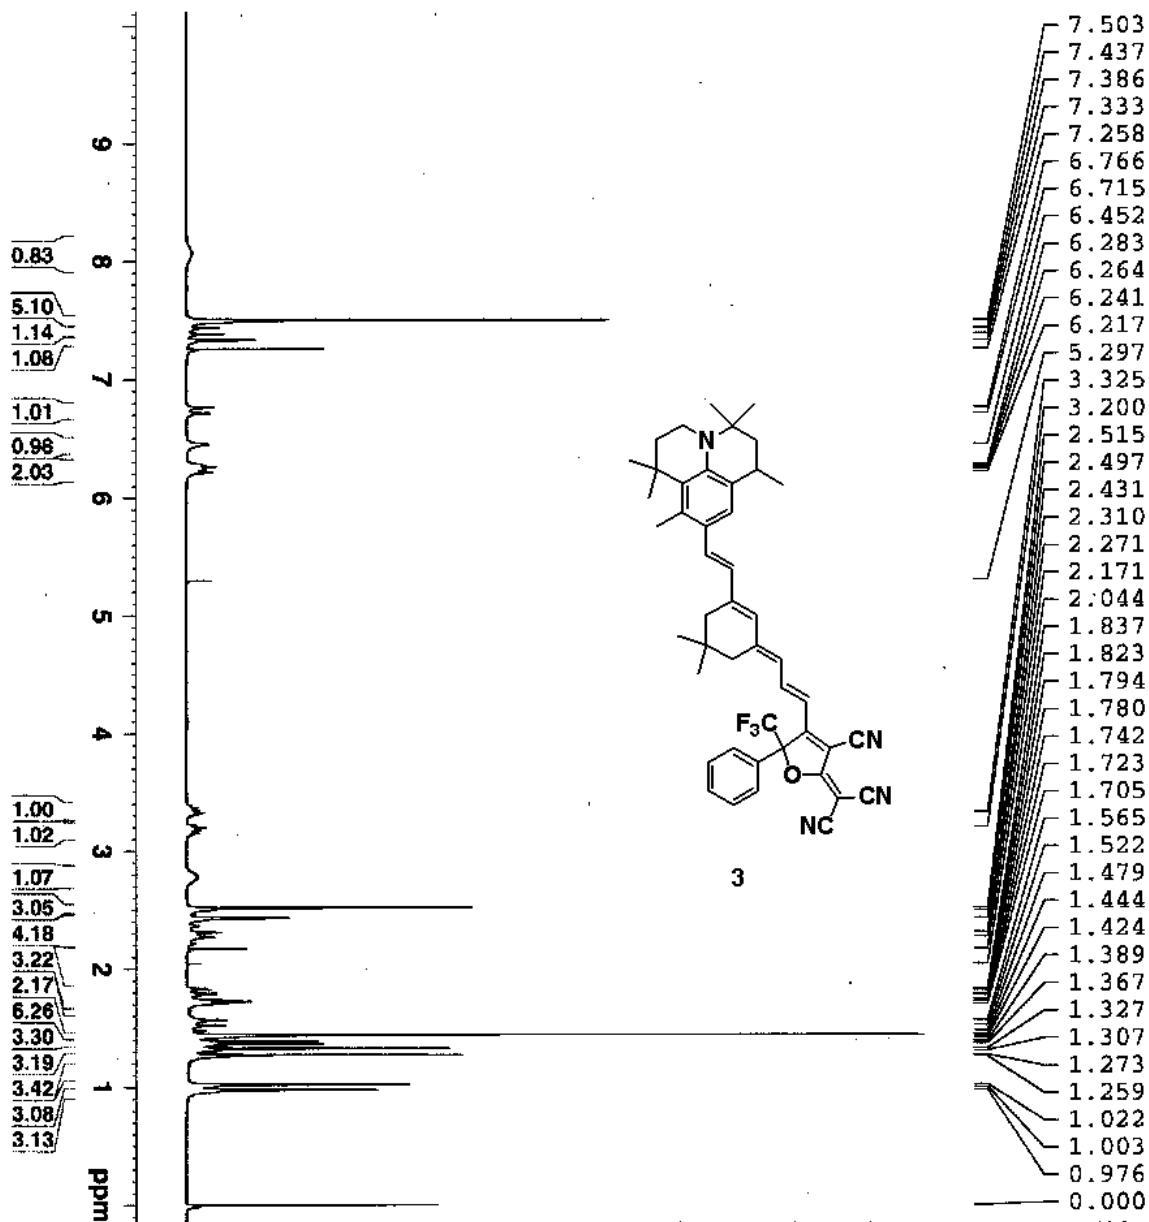

- 7.503
- 7.437
- 7.386
- 7.333
- 7.258
- 6.766
- 6.715
- 6.452
- 6.283
- 6.264
- 6.241
- 6.217
- 5.297
- 3.325
- 3.200
- 2.515
- 2.497
- 2.431
- 2.310
- 2.271
- 2.171
- 2.044
- 1.837
- 1.823
- 1.794
- 1.780
- 1.742
- 1.723
- 1.705
- 1.565
- 1.522
- 1.479
- 1.444
- 1.424
- 1.389
- 1.367
- 1.327
- 1.307
- 1.273
- 1.259
- 1.022
- 1.003
- 0.976
- 0.000

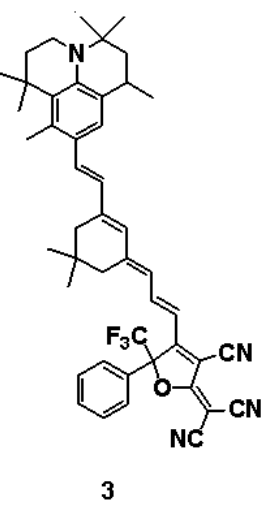

```

Current Data Parameters
NAME          JLD-Chimp
EXNO         1
PROCNO       1

F2 - Acquisition Parameters
Date_        20101201
Time         15.02
INSTRUM      spect
PROBHD       5 mm TxD 13C/2
PULPROG      zg
TD           32768
SOLVENT      CDCl3
NS           13
DS           0
SWH          3396.513 Hz
FIDRES      0.103653 Hz
AQ          4.8218211 sec
RG          406.4
DR          147.210 usec
TE          298.0 K
D1          1.00000000 sec
MCREST      0.00000000 sec
MCGRK       0.01500000 sec

===== CHANNEL f1 =====
NUC1         1H
P1          12.25 usec
PL1         -2.00 dB
SFO1        300.1015350 MHz

F2 - Processing parameters
SI          32768
SF          300.1000080 MHz
WDW         no
SSB         0
LB          0.00 Hz
GB          0
PC          1.00
    
```

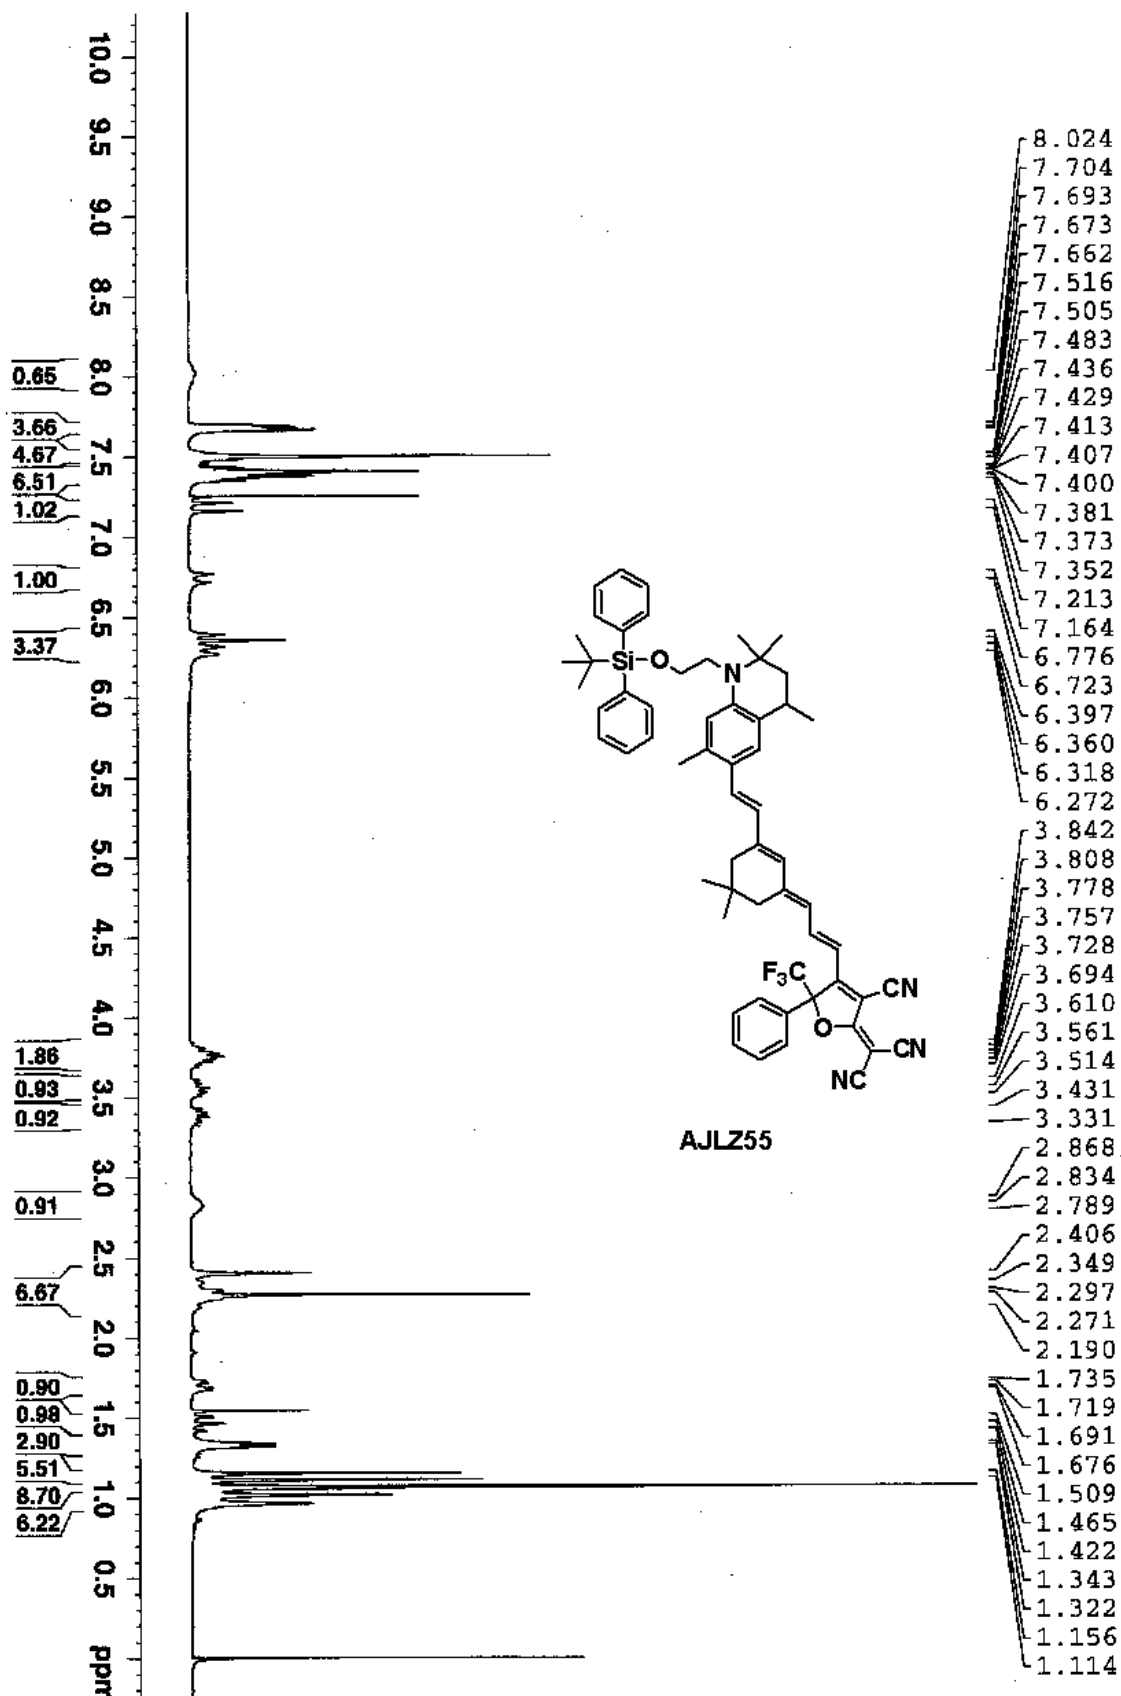

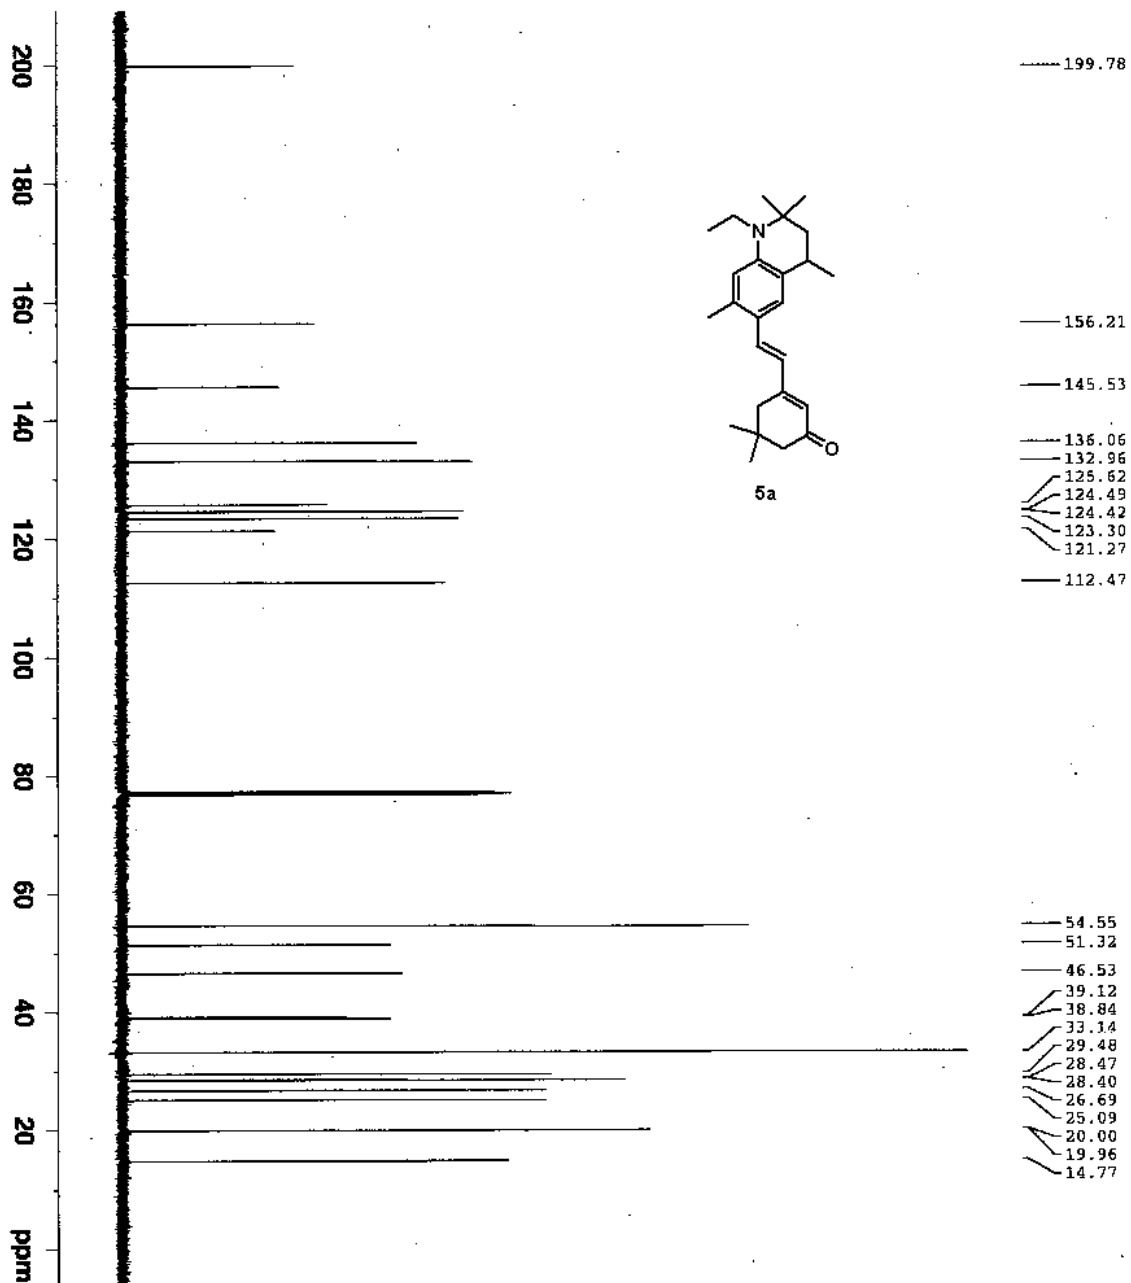

```

NAME THQ-Kto-C13
EXPNO 1
PROCNO 1
Date_ 20101123
Time 17.09
INSTRUM spect
PROBRD 5 mm BBO BB-1H
PULPROG zgpg30
TD 65536
SOLVENT CDCl3
NS 268
DS 4
SFR 30030.029 HZ
FIDRES 0.458222 HZ
AQ 1.0912410 sec
RG 20642.5
DM 16.650 us
DE 6.50 us
TE 298.0 K
D1 2.00000000 sec
D11 0.03000000 sec
TD0 1

===== CHANNEL F1 =====
NUC1 13C
P1 15.00 us
PL1 6.00 dB
PR1M 19.93825150 MHz
SFO1 125.7492404 MHz

===== CHANNEL F2 =====
CPDPRG2 waltz16
NUC2 1H
PCPD2 70.00 us
PL2 -2.00 dB
PL12 12.96 dB
PL13 20.00 dB
SFO2 500.0480002 MHz
SI 32768
SF 125.7368915 MHz
WDW no
SSB 0
LB 0.00 Hz
GB 0
PC 1.00
    
```

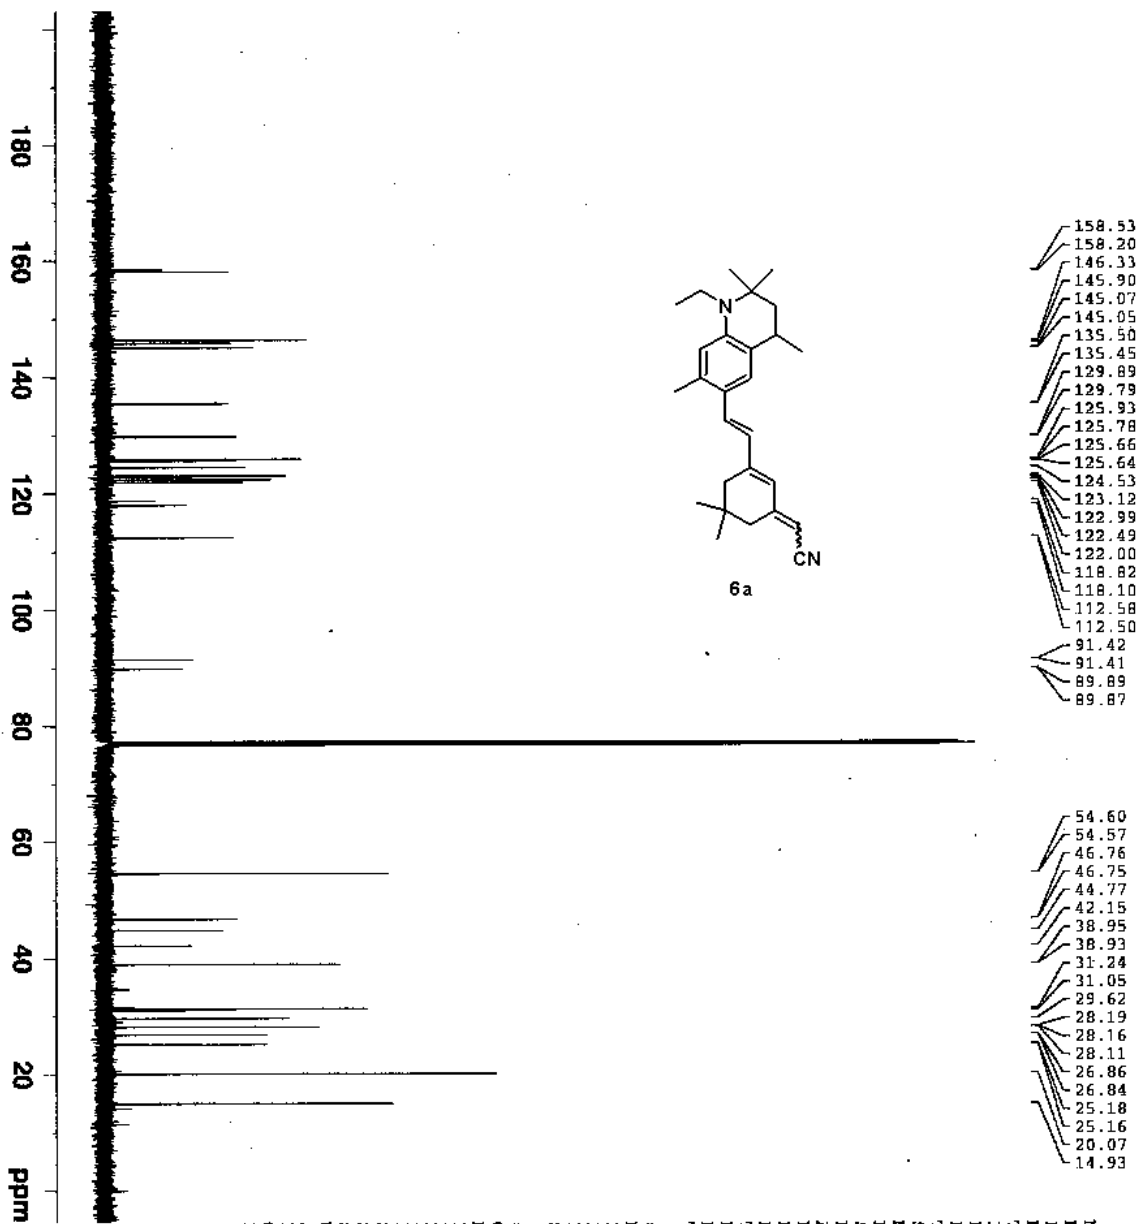

- 158.53
- 158.20
- 146.33
- 145.90
- 145.07
- 145.05
- 135.50
- 135.45
- 129.89
- 129.79
- 125.93
- 125.78
- 125.66
- 125.64
- 124.53
- 123.12
- 122.99
- 122.49
- 122.00
- 118.82
- 118.10
- 112.58
- 112.50
- 91.42
- 91.41
- 89.89
- 89.87

- 54.60
- 54.57
- 46.76
- 46.75
- 44.77
- 42.15
- 38.95
- 38.93
- 31.24
- 31.05
- 29.62
- 28.19
- 28.16
- 28.11
- 26.86
- 26.84
- 25.18
- 25.16
- 20.07
- 14.93

```

NAME THQ-CN-C13
EXPNO 1
PROCNO 1
Date_ 20101123
Time 16.26
INSTRUM spect
PROBHD 5 mm BBO BB-1H
PULPROG zgpg30
TD 65536
SOLVENT CDCl3
NS 441
DS 4
SWH 30030.029 Hz
FIDRES 0.458222 Hz
AQ 1.0912410 sec
RG 20642.5
DM 16.650 usec
DE 6.50 usec
TE 298.0 K
D1 2.00000000 sec
D11 0.03000000 sec
TD0 1

===== CHANNEL f1 =====
NUC1 13C
P1 15.00 usec
PL1 6.00 dB
PL12 19.93825150 W
SFO1 125.7492404 MHz

===== CHANNEL f2 =====
CPDPRG2 waltz16
NUC2 1H
PCPD2 70.00 usec
PL2 -2.00 dB
PL12 12.96 dB
PL13 20.00 dB
SFO2 500.0480002 MHz
SI 32768
SF 125.7366759 MHz
WDW no
SSB 0
LB 0.00 Hz
GB 0
PC 1.40
    
```

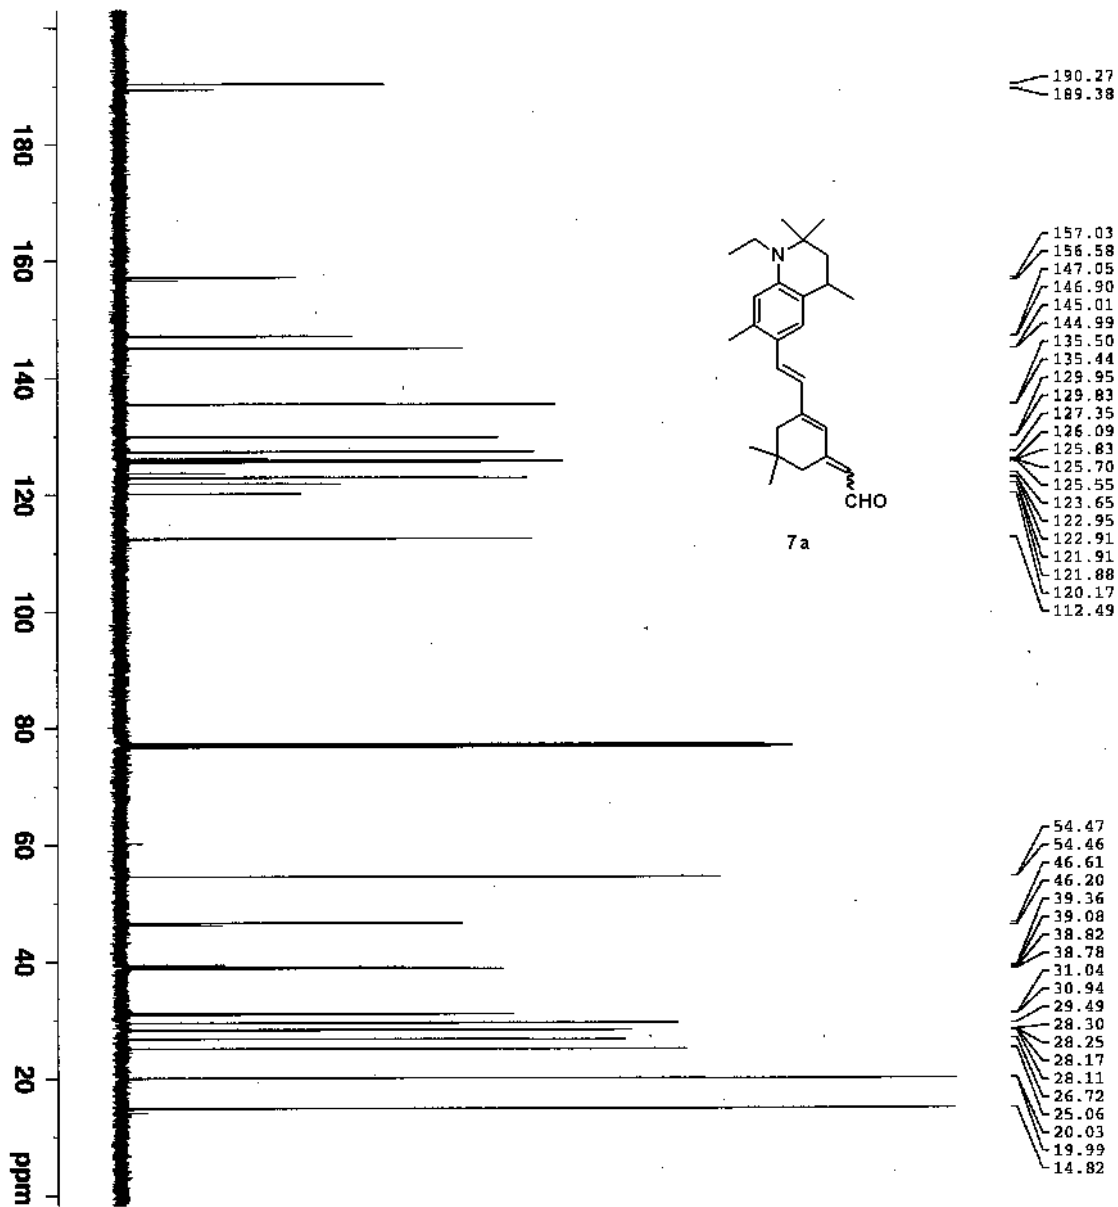

```

NAME          THQ-CHO C13
EXPNO         1
PROCNO        1
Date_         20101129
Time          14.55
INSTRUM       spect
PROBHD        5 mm BBO BB-1H
PULPROG       zgpg30
TD            65536
SOLVENT       CDCl3
NS            399
DS            4
SMR           30030.029 H
FIDRES        0.458222 H
AQ            1.0912410 s
RG            18390.4
DW            16.650 u
DE            6.50 u
TE            298.0 K
D1            2.00000000 s
D11           0.03000000 s
TD0           1

===== CHANNEL f1 =====
NUC1          13C
P1            15.00 u
PL1           6.00 d
PL1W          19.93825150 W
SFO1          125.7492404 M

===== CHANNEL f2 =====
CPDPRG2      waltz16
NUC2          1H
PCPD2        70.00 u
PL2          -2.00 d
PL12         12.96 d
PL13         20.00 d
SFO2         500.0480002 M
SI           32768
SF           125.7368944 M
WDW          no
SSB          0
LB           0.00 H
GB           0
PC           1.00
    
```



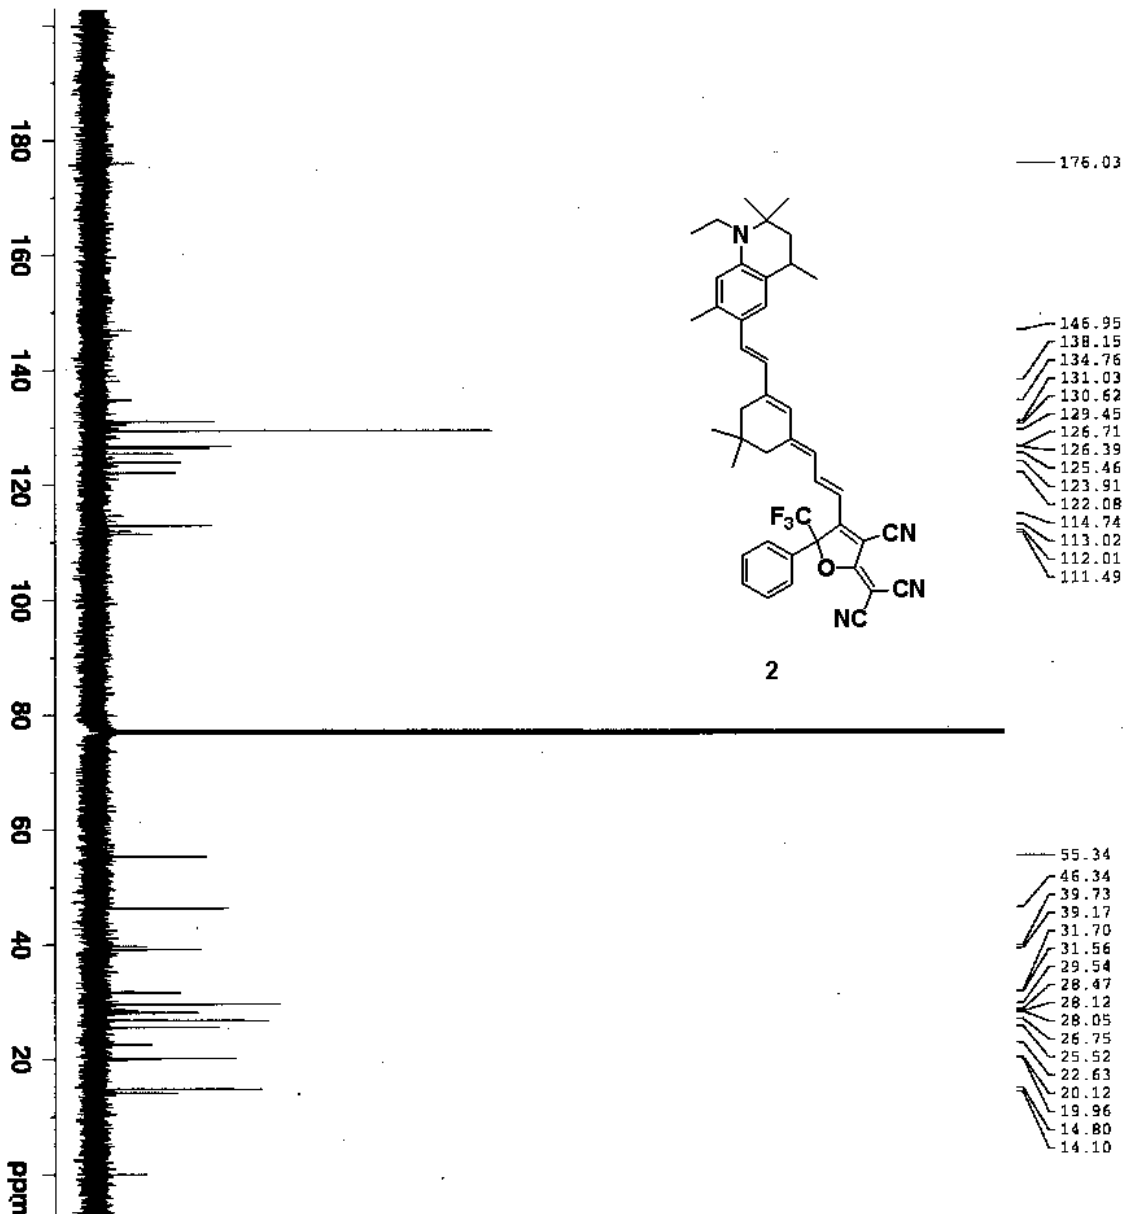

```

NAME THQ-Chmp C13
EXPNO 1
PROCNO 1
Date_ 20101130
Time 14.12
INSTRUM spect
PROBHD 5 mm BBO BB-1H
PULPROG zgpg30
TD 65536
SOLVENT CDCl3
NS 1368
DS 4
SWH 30030.029 Hz
FIDRES 0.458222 Hz
AQ 1.0917410 sec
RG 20642.5
DW 16.650 usec
DE 6.50 usec
TE 298.0 K
D1 2.00000000 sec
D11 0.03000000 sec
TD0 1

===== CHANNEL F1 =====
NUC1 13C
P1 15.00 usec
PL1 6.00 dB
PL12 19.93825150 W
SFO1 125.7492404 MHz

===== CHANNEL F2 =====
CPDPRG2 waltz16
NUC2 1H
PCPD2 70.00 usec
PL2 -2.00 dB
PL12 12.96 dB
PL13 20.00 dB
SFO2 500.0480002 MHz
SI 32768
SF 125.7366723 MHz
WDW no
SSB 0
LB 0.00 Hz
GB 0
PC 1.40
    
```

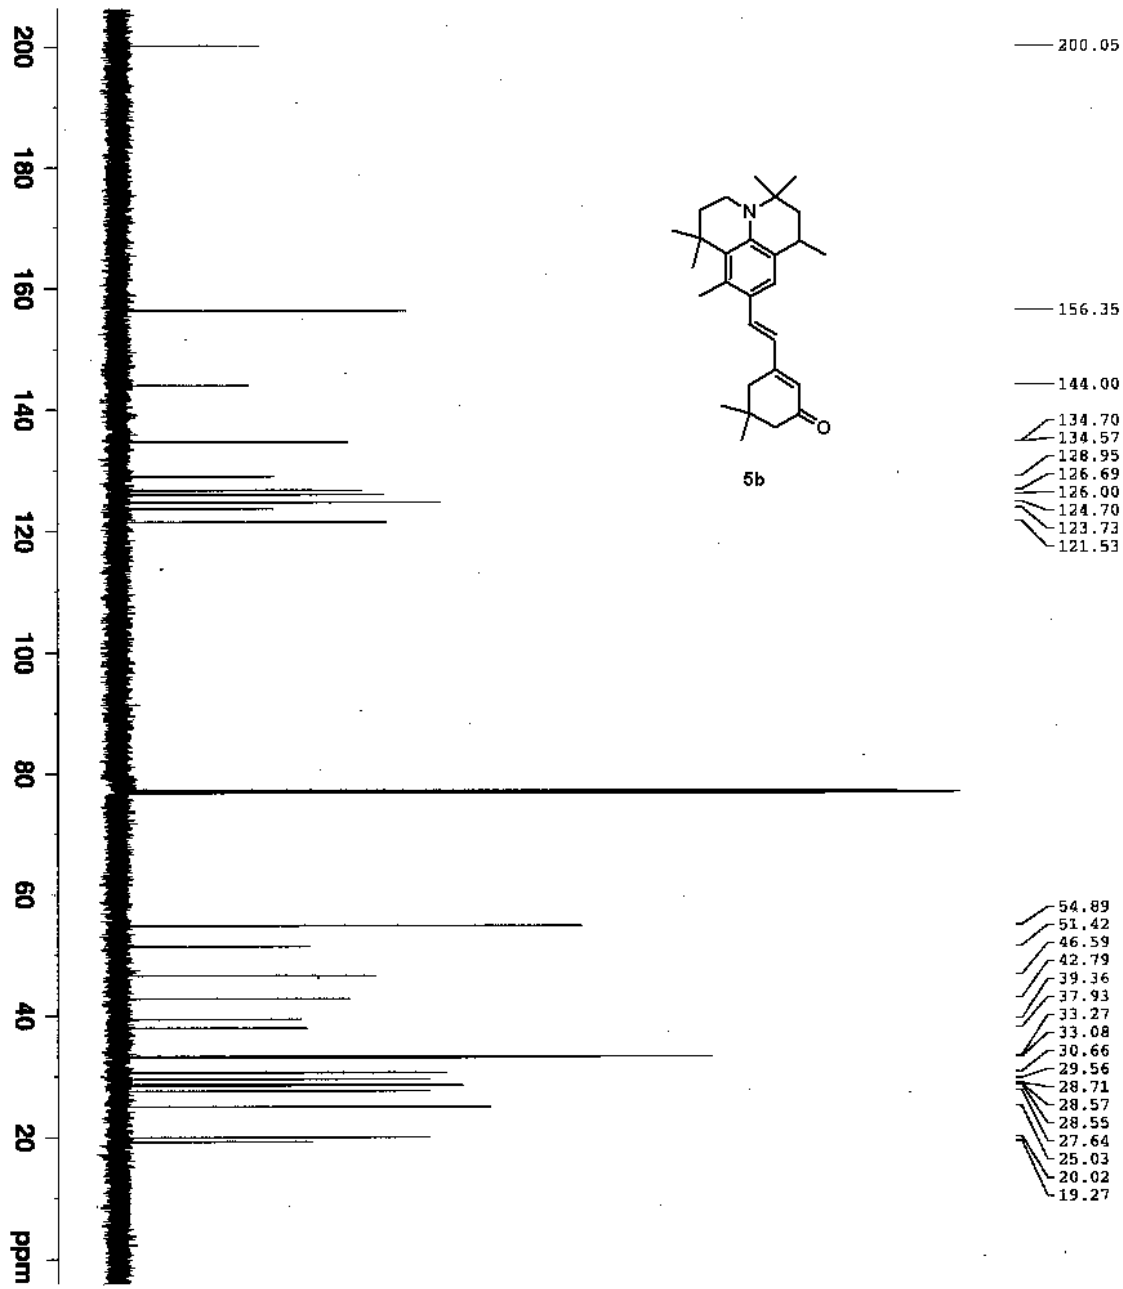

```

NAME          JUR-R10-C13
EXPNO         1
PROCNO        1
Date_         20101123
Time          17.29
INSTRUM       5 mm BBO BB-1H
PROBHD        zgpg30
PULPROG       65536
TD            CDCl3
SOLVENT       268
NS            4
DS            4
SWH           30030.029 Hz
FIDRES        0.458232 Hz
AQ            1.0912410 sec
RG            20642.5
DM            16.650 us
DE            6.50 us
TE            298.0 K
PE            0.03000000 sec
D1            1
D11           0.03000000 sec
TD0           1

===== CHANNEL f1 =====
NUC1          13C
P1            15.00 us
PL1           6.00 dB
PULPR1        19.93825150 w
SFO1          125.7492404 MHz

===== CHANNEL f2 =====
CPDPRG2      waltz16
NUC2          1H
PCPDZ        70.00 us
PL2          -2.00 dB
PL12         12.96 dB
PL13         20.00 dB
SFO2         500.0480002 MHz
SI           32768
SF           125.7366760 MHz
WDW          no
SSB          0
LB           0.00 Hz
GB           0
PC           1.40
    
```

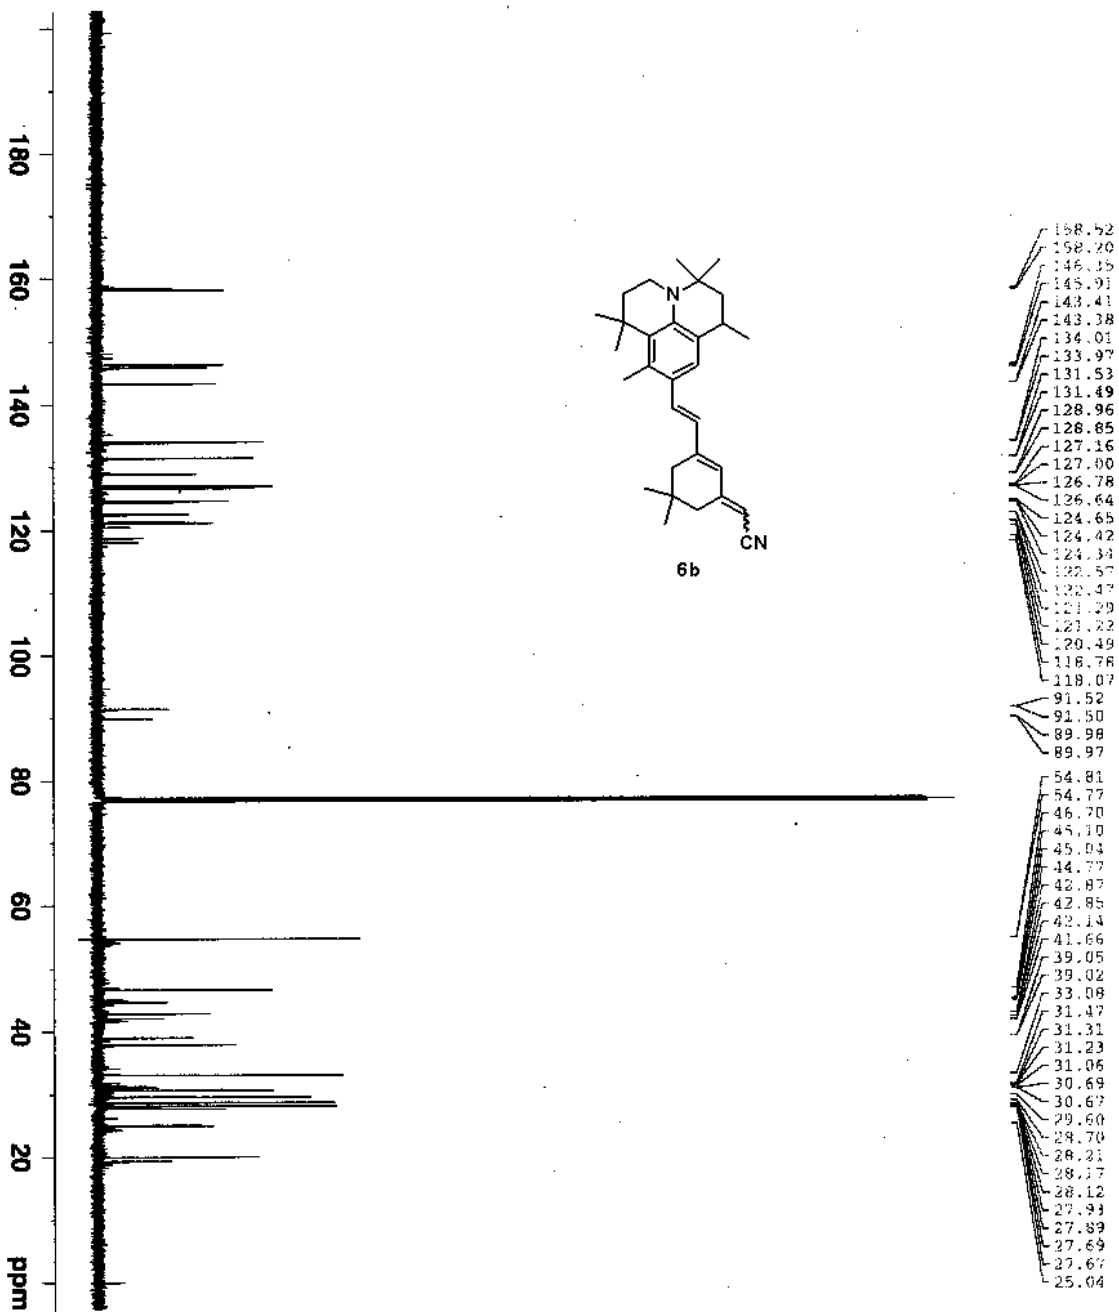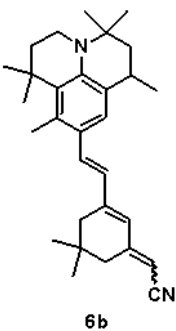

```

NAME          JIR-CN-13C
EXPNO         1
PROCNO        1
Date_         20101129
Time         12.46
INSTRUM       5 mm BBO BB-1H
PROBHD        ZPPG30
PULPROG       zgpg30
TD            65536
SOLVENT       CDCl3
NS            1175
DS            4
SMH           30030.029
FIDRES        0.458322
AQ            1.0912410
RG            32768
DM            16.650
DE            6.50
TE            298.0
D1            2.000000000
D11           0.030000000
TD0           1

===== CHANNEL f1 =====
NUC1          13C
P1            15.00
PL1           6.00
PULP1         19.93825150
SFO1          125.7492404

===== CHANNEL f2 =====
CPDPRG2      waltz16
NUC2          1H
PCPD2        70.00
PL2           2.00
PL12         12.96
PL13         20.00
SFO2         500.0480002
SI           32768
SF           125.736769
WDW          no
SSB          0
GB           0.00
PC           1.40
    
```

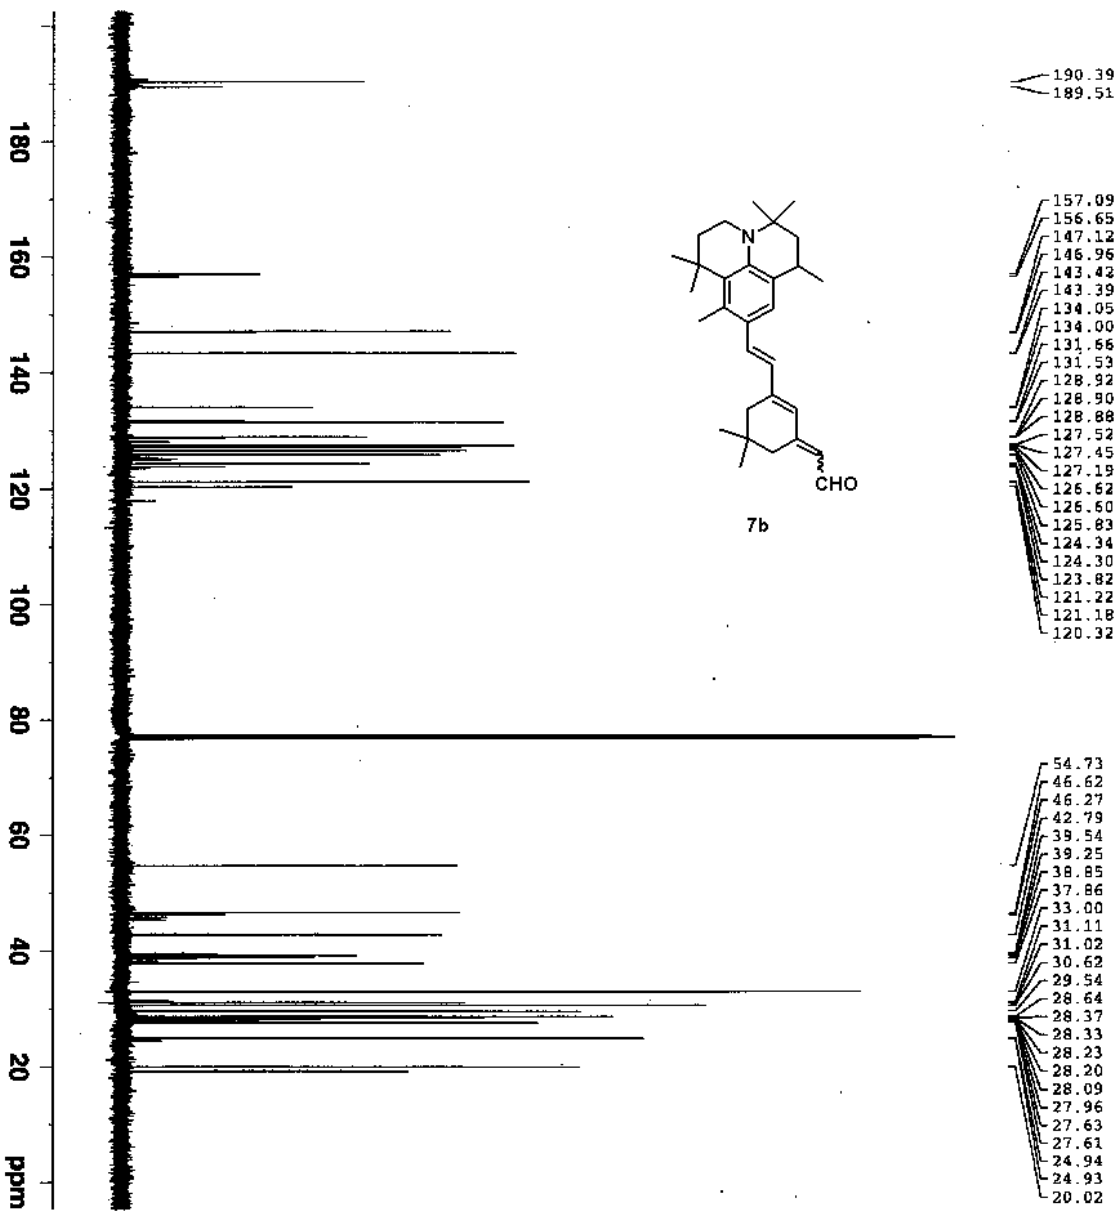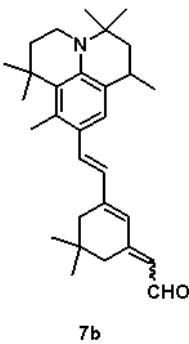

- 190.39
- 189.51
- 157.09
- 156.65
- 147.12
- 146.96
- 143.42
- 143.39
- 134.05
- 134.00
- 131.66
- 131.53
- 128.92
- 128.90
- 128.88
- 127.52
- 127.45
- 127.19
- 126.62
- 126.60
- 125.83
- 124.34
- 124.30
- 123.82
- 121.22
- 121.18
- 120.32

- 54.73
- 46.62
- 46.27
- 42.79
- 39.54
- 39.25
- 38.85
- 37.86
- 33.00
- 31.11
- 31.02
- 30.62
- 29.54
- 28.64
- 28.37
- 28.33
- 28.23
- 28.20
- 28.09
- 27.96
- 27.63
- 27.61
- 24.94
- 24.93
- 20.02

```

NAME          JLD-CHO C13
EXPNO         1
PROCNO        1
Date_         20101129
Time          15.23
INSTRUM       spect
PROBHD        5 mm BBO BB-1H
PULPROG       zgpg30
TD            65536
SOLVENT       CDCl3
NS            411
DS            4
SWH           30030.029 Hz
FIDRES       0.458222 Hz
AQ           1.0912410 sec
RG           18390.4
KW           16.650 use
DE           6.50 use
TR           298.0 K
D1           2.00000000 sec
D11          0.03000000 sec
TD0          1

===== CHANNEL f1 =====
NUC1          13C
P1           15.00 use
PL1          8.00 dB
PL1W        19.93825150 W
SF01        125.7492404 MHz

===== CHANNEL f2 =====
CPDPRG2      waltz16
NUC2         1H
PCPD2       70.00 use
PL2         -2.00 dB
PL12        13.96 dB
PL13        20.00 dB
SF02        500.0480002 MHz
SI          32768
SF          125.7366870 MHz
MDW         no
SSB         0
LB          0.00 Hz
GB          0
PC          1.40
    
```

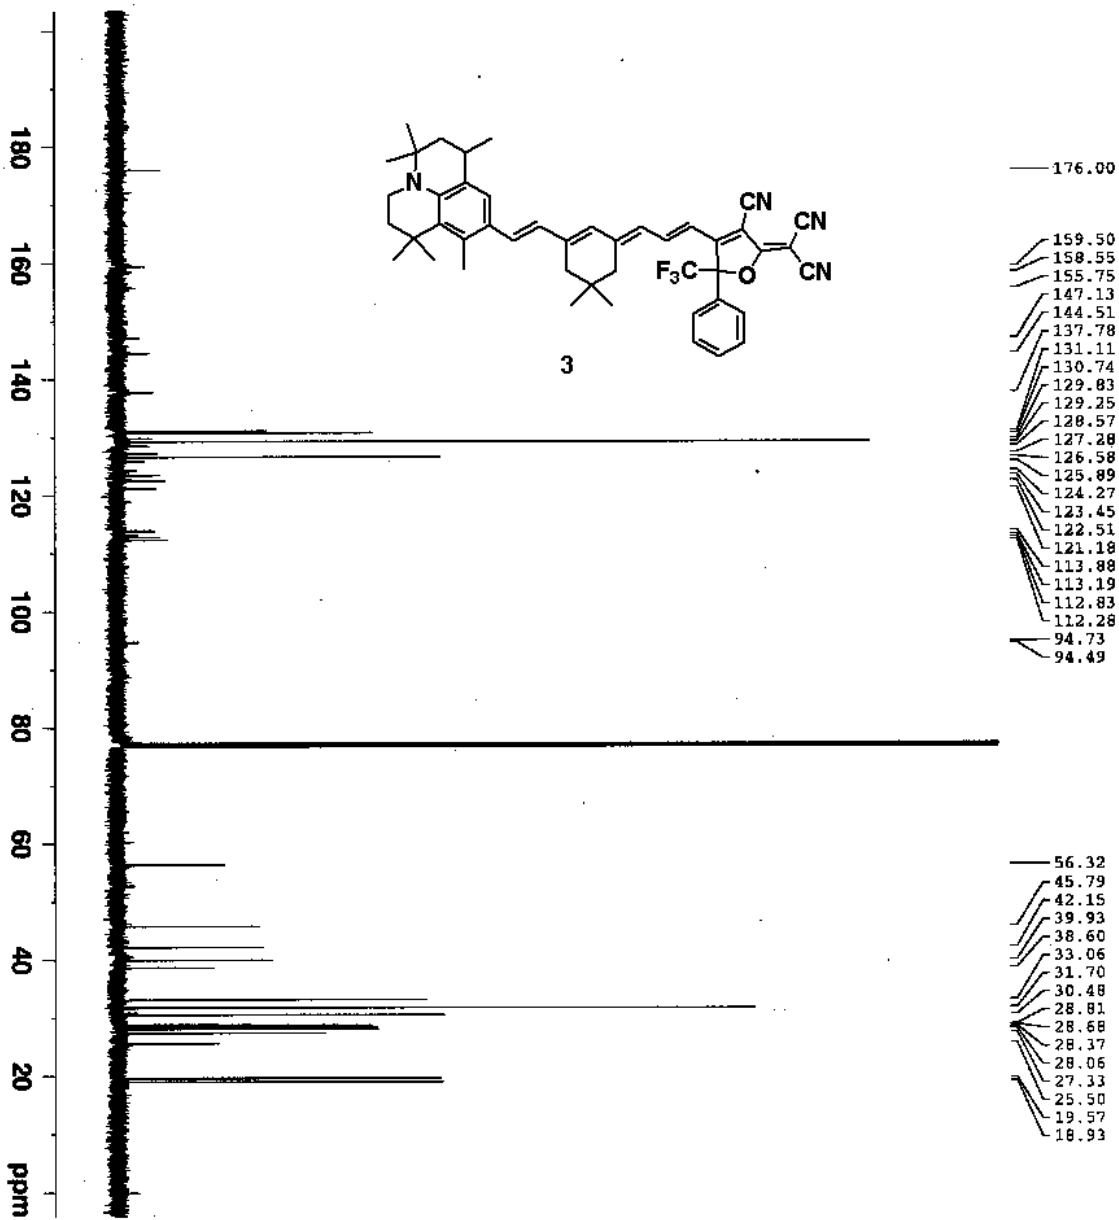

```

NAME          JLD-Chmp C13
EXPNO         1
PROCNO        1
Date_         20101201
Time          16.07
INSTRUM       spect
PROBHD        5 mm BBO BB-1H
PULPROG       zgpg30
TD            65536
SOLVENT       CDCl3
NS            2049
DS            4
SWH           30030.029 Hz
FIDRES        0.458222 Hz
AQ            1.0912410 se
RG            20642.5
DM            16.650 us
DE            6.50 us
TE            298.0 K
D1            2.00000000 se
D11           0.03000000 se
TDO           1

===== CHANNEL F1 =====
NUC1          13C
P1            15.00 us
PL1           6.00 dB
PL1W          19.93825150 W
SFO1          125.7492404 MHz

===== CHANNEL F2 =====
CPDPRG2      waltz16
NUC2          1H
PCPD2        70.00 us
PL2          -2.00 dB
PL12         12.96 dB
PL13         20.00 dB
SFO2         500.0480002 MHz
SI           32768
SF           125.7366833 MHz
WDW           no
SSB           0
LB            0.00 Hz
GB            0
PC            1.40
    
```

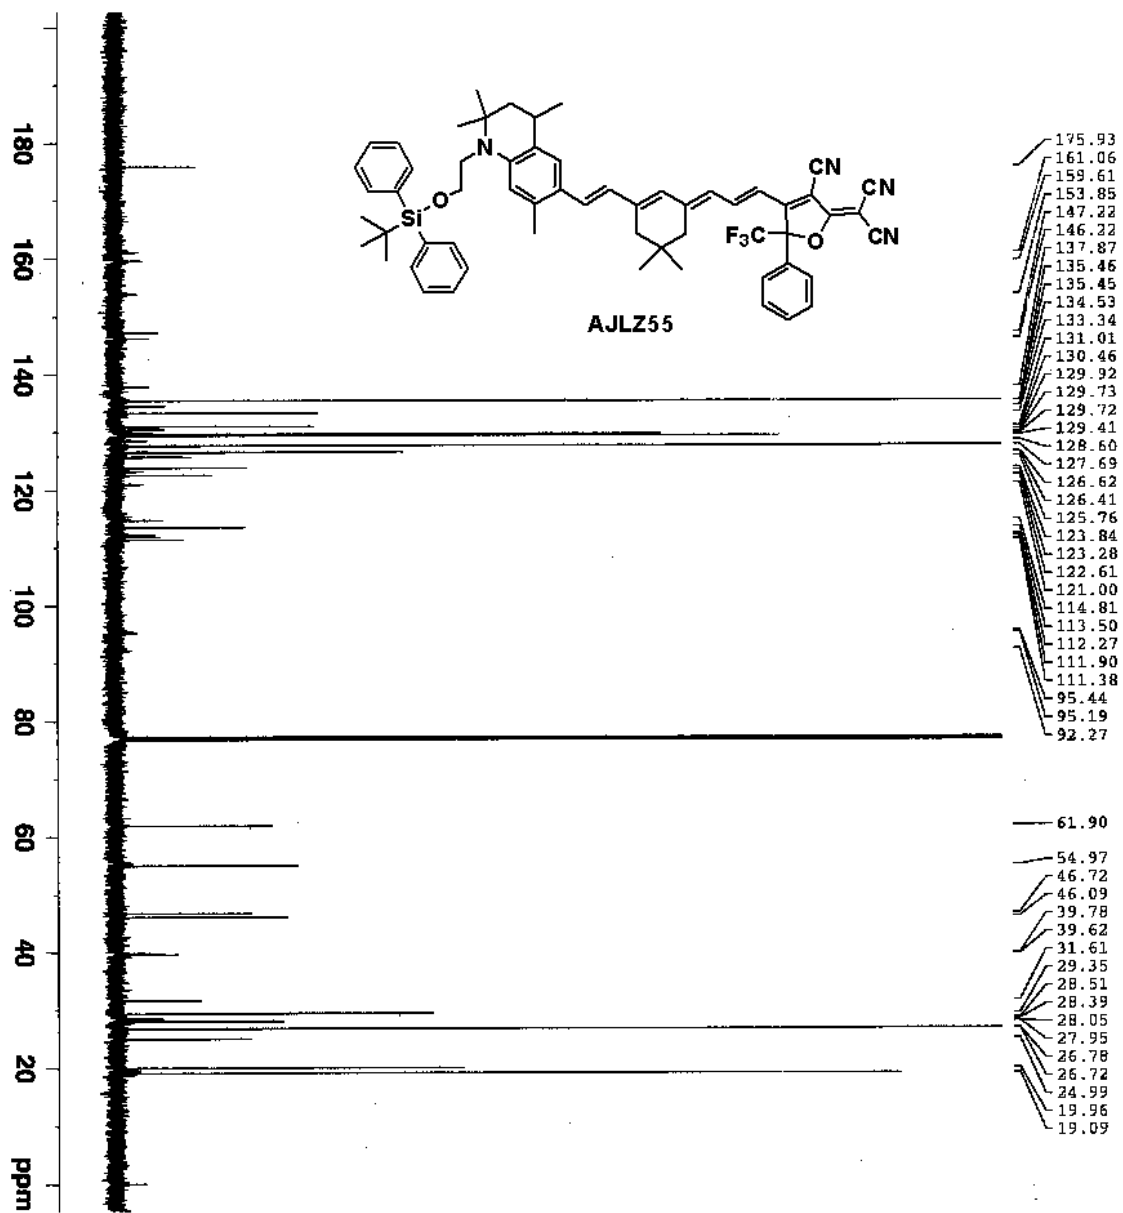

```

NAME          1Z55 C13
EXPNO         1
PROCNO        1
Date_         20101203
Time         16.12
INSTRUM       spect
PROBHD        5 mm BBO BB-1H
PULPROG       zgpg30
TD            65536
SOLVENT       CDCl3
NS            1555
DS            4
SWH           30030.029 Hz
FIDRES        0.458222 Hz
AQ            1.0912410 s
RG            20642.5
DW            16.650 Hz
DE            6.50 Hz
TE            298.0 K
D1            2.00000000 s
D11           0.03000000 s
TD0           1

===== CHANNEL f1 =====
NUC1          13C
P1            15.00 Hz
PL1           6.00 Hz
PL1W          19.93825150 Hz
SFO1          125.7492404 MHz

===== CHANNEL f2 =====
CPRPG2       waltz16
NUC2          1H
PCPD2        70.00 Hz
PL2          -2.00 Hz
PL12         12.96 Hz
PL13         20.00 Hz
SFO2         500.0480002 MHz
SI           32768
SF           125.7366861 MHz
WDW          no
SSB          0
LB           0.00 Hz
GB           0
PC           1.40
    
```
